# Supplementary material for: Molecularly dispersed nickel complexes on N-doped graphene for electrochemical CO2reduction
Source: Royal Society of Chemistry journal article supplement (doi:10.1039/d3dt00878a), 2023-01-01
Supplement: d3dt00878a1.pdf [file d3dt00878a1.pdf]

## Supplementary Information

### **Molecularly Dispersed Nickel Complexes on N-doped Graphene for Electrochemical CO<sub>2</sub> Reduction**

Methasit Juthathan, Teera Chantarojsiri, Kittipong Chainok, Teera Butburee, Patchanita Thamyongkit, Thawatchai Tuntulani, and Pannee Leeladee\*

- 
- [a] Methasit Juthathan, Prof. Dr. Patchanita Thamyongkit, Prof. Dr. Thawatchai Tuntulani, Assist. Prof. Dr. Pannee Leeladee  
Department of Chemistry, Faculty of Science  
Chulalongkorn University  
Bangkok, Thailand.  
E-mail: [pannee.l@chula.ac.th](mailto:pannee.l@chula.ac.th)
- [b] Assist. Prof. Dr. Teera Chantarojsiri  
Centre of Excellence for Innovation in Chemistry (PERCH-CIC), Department of Chemistry, Faculty of Science  
Mahidol University  
Bangkok, Thailand.
- [c] Assoc. Prof. Dr. Kittipong Chainok  
Thammasat University Research Unit in Multifunctional Crystalline Materials and Applications (TU-McMa), Faculty of Science and Technology  
Thammasat University  
Pathum Thani, Thailand.
- [d] Dr. Teera Butburee  
National Nanotechnology Center, National Science and Technology Development Agency, Thailand Science Park  
Pathum Thani, Thailand.

## Table of Contents

|                                                                                   |           |
|-----------------------------------------------------------------------------------|-----------|
| <b>Synthetic Procedures .....</b>                                                 | <b>3</b>  |
| Step i : Synthesis of 2,2'-iminobis(methyl benzoate) .....                        | 3         |
| Step ii : Synthesis of 2,2'-iminobis(hydroxymethyl benzene).....                  | 3         |
| Step iii: Synthesis of 2,2'-iminobisbenzaldehyde .....                            | 4         |
| <b>Electrochemical Studies in Non-aqueous Electrolyte .....</b>                   | <b>5</b>  |
| <b>UV-visible Spectra of Ni Complexes Before and After Adsorption on NG .....</b> | <b>17</b> |
| <b>Scanning Electron Microscopic Images .....</b>                                 | <b>18</b> |
| <b>Electrochemical Studies in Aqueous Electrolyte.....</b>                        | <b>20</b> |
| <b>Calculation of Faradaic Efficiency.....</b>                                    | <b>30</b> |
| <b>Summarized Data of Bulk Electrolysis at Various Potential Applied.....</b>     | <b>32</b> |

## Synthetic Procedures

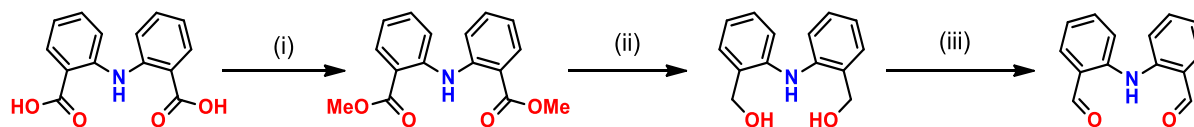

**Scheme 1** Synthetic routes of 2,2'-iminobisbenzaldehyde. (i) conc. H<sub>2</sub>SO<sub>4</sub>, MeOH. (ii) LiAlH<sub>4</sub>, Et<sub>2</sub>O. (iii) MnO<sub>2</sub>, Et<sub>2</sub>O.

### Step i : Synthesis of 2,2'-iminobis(methyl benzoate)

A two-neck round-bottom flask was charged with 2,2'-iminodibenzoic acid (500 mg, 1.94 mmol) and methanol (20 mL), then concentrated H<sub>2</sub>SO<sub>4</sub> (1 mL) was slowly added into. The reaction mixture was refluxed for 5 hours and monitored by thin layer chromatography using 1:4 EtOAc: Hexane as a solvent system. After removal of methanol, the reaction was then cautiously added 10 mL of Na<sub>2</sub>CO<sub>3</sub> (2.40 g). (Note: the CO<sub>2</sub> bubbling occurs upon the addition of Na<sub>2</sub>CO<sub>3</sub>). After the bubbling subsides, the solution was extracted with 5 mL of 15% NaCl, followed by CH<sub>2</sub>Cl<sub>2</sub> (3 x 10 mL). The combined organic layer was then washed with 10 mL of saturated NaCl, after which the CH<sub>2</sub>Cl<sub>2</sub> was removed by reduced pressure to afford the pale-yellow solid as the desired product (477 mg, 86%). <sup>1</sup>H NMR (400 MHz, CDCl<sub>3</sub>, 298 K): δ(ppm) = 3.94 (s, 6H, CH<sub>3</sub>), 6.90 (t, *J* = 7.5 Hz, 2H, ArH), 7.37 (t, *J* = 7.3 Hz, 2H, ArH), 7.55 (d, *J* = 8.5 Hz, 2H, ArH), 7.99 (d, *J* = 6.9 Hz, 2H, ArH), 11.05 (s, 1H, NH).

### Step ii : Synthesis of 2,2'-iminobis(hydroxymethyl benzene)

To a suspension of LiAlH<sub>4</sub> (151 mg, 3.97 mmol) in anhydrous Et<sub>2</sub>O (40 mL) was cautiously added 2,2'-iminobis(methyl benzoate) (453 mg, 1.59 mmol) over a 15 minute period. The resulting mixture was stirred overnight, after which was quenched sequentially in ice bath by ethyl acetate (3 mL), water (3 mL), NaOH (3 mL, 15%) and water (20 mL), and then filtered. The precipitate was extracted with boiling chloroform (3 x 10 mL). The solvent was removed under reduced pressure, resulting the crude off-white solid which was then purified by precipitating in CH<sub>2</sub>Cl<sub>2</sub>/Hexane to afford the white solid (255 mg, 70%). <sup>1</sup>H NMR (400 MHz, DMSO-*d*<sub>6</sub>, 298 K): δ(ppm) = 4.48 (d, *J* = 5.0 Hz, 4H, CH<sub>2</sub>), 5.26 (t, *J* = 5.1 Hz, 2H, OH), 6.87 (t, *J* = 7.2 Hz, 2H, ArH), 7.04 (d, *J* = 7.9 Hz, 2H, ArH), 7.15 (t, *J* = 7.4 Hz, 2H, ArH), 7.31 (d, *J* = 7.3 Hz, 2H, ArH), 7.40 (s, 1H, NH).

### Step iii: Synthesis of 2,2'-iminobisbenzaldehyde

To a colourless solution of 2,2'-iminobis(hydroxymethyl benzene) (230 mg, 1.00 mmol) in dry Et<sub>2</sub>O (30 mL) was added an activated MnO<sub>2</sub> (1.75 g, 20.13 mmol). The resulting black suspension was stirred at room temperature overnight. The MnO<sub>2</sub> was then filtered off and extracted with boiling chloroform (3 x 10 mL). The combined extracts and filtrate were concentrated to yield a yellow solid. This crude yellow solid was purified by chromatography on silica gel with 1:4 EtOAc: Hexane (R<sub>f</sub> = 0.4), giving the title product as a bright yellow crystalline solid (138 mg, 62%). <sup>1</sup>H NMR (400 MHz, CDCl<sub>3</sub>, 298 K): δ(ppm) = 7.08 (t, *J* = 7.3 Hz, 2H, ArH), 7.47 (t, *J* = 7.6 Hz, 2H, ArH), 7.55 (d, *J* = 8.0 Hz, ArH), 7.71 (d, *J* = 7.7 Hz, 2H, ArH), 10.03 (s, 2H, CHO), 11.36 (s, 1H, NH).

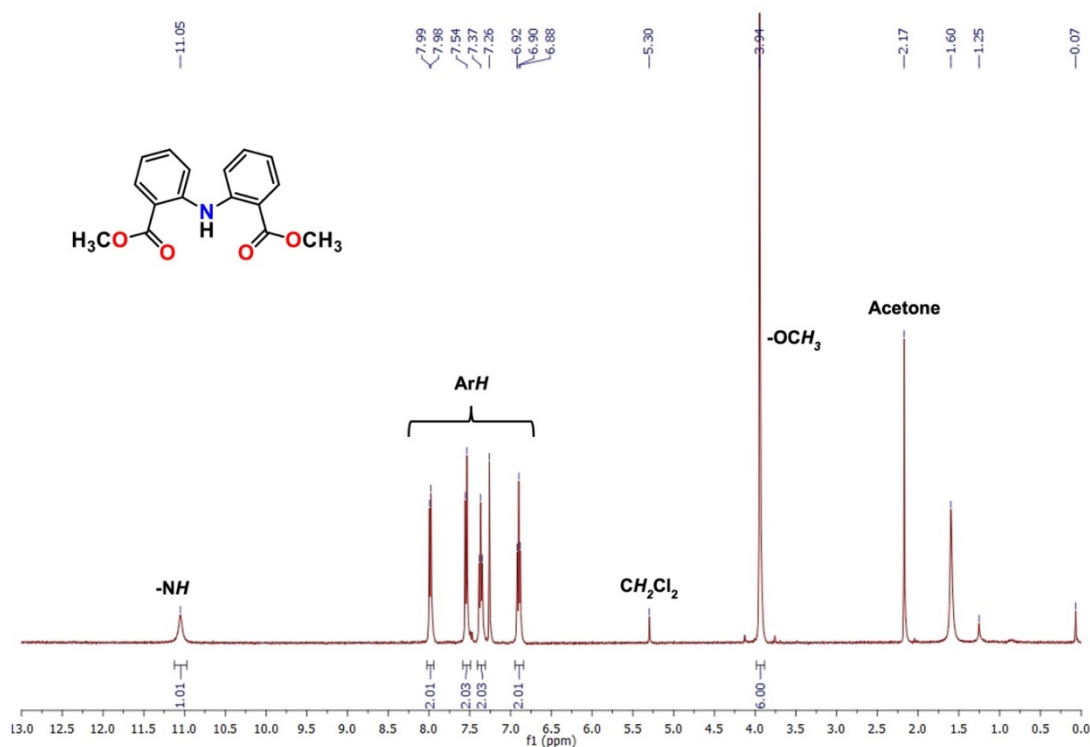

Fig. S1 <sup>1</sup>H NMR spectrum of 2,2'-iminobis(methyl benzoate) in CDCl<sub>3</sub>.

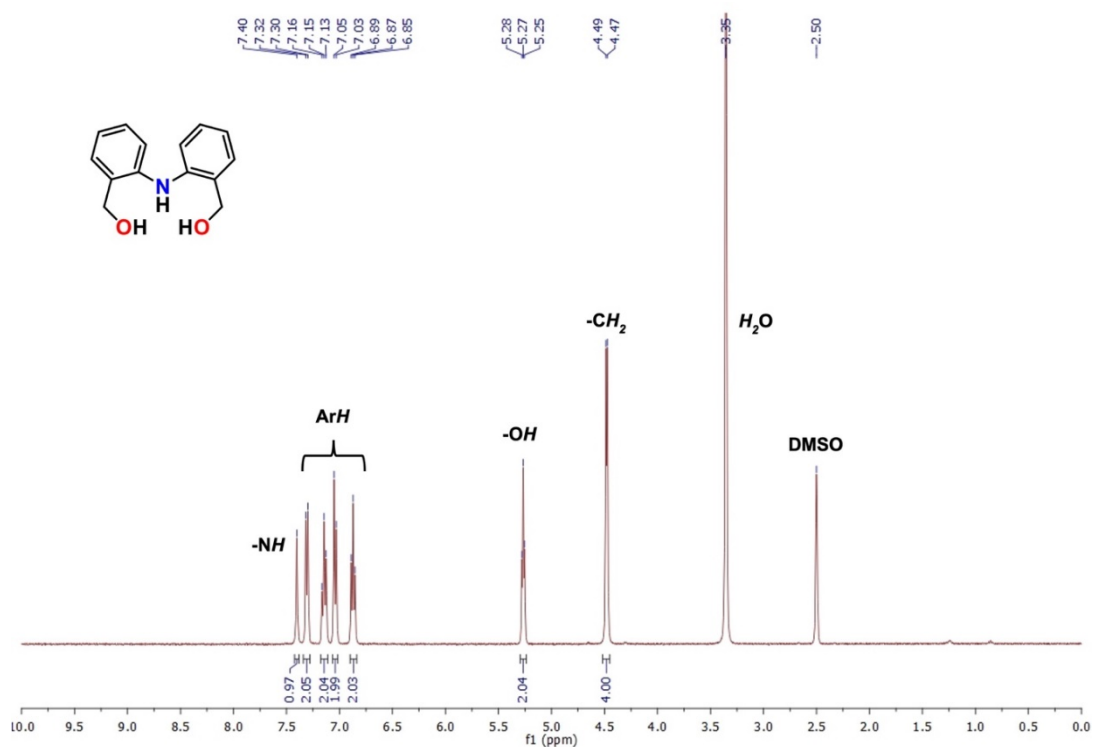

Fig. S2 <sup>1</sup>H NMR spectrum of 2,2'-iminobis(hydroxymethyl benzene) in DMSO-d<sub>6</sub>.

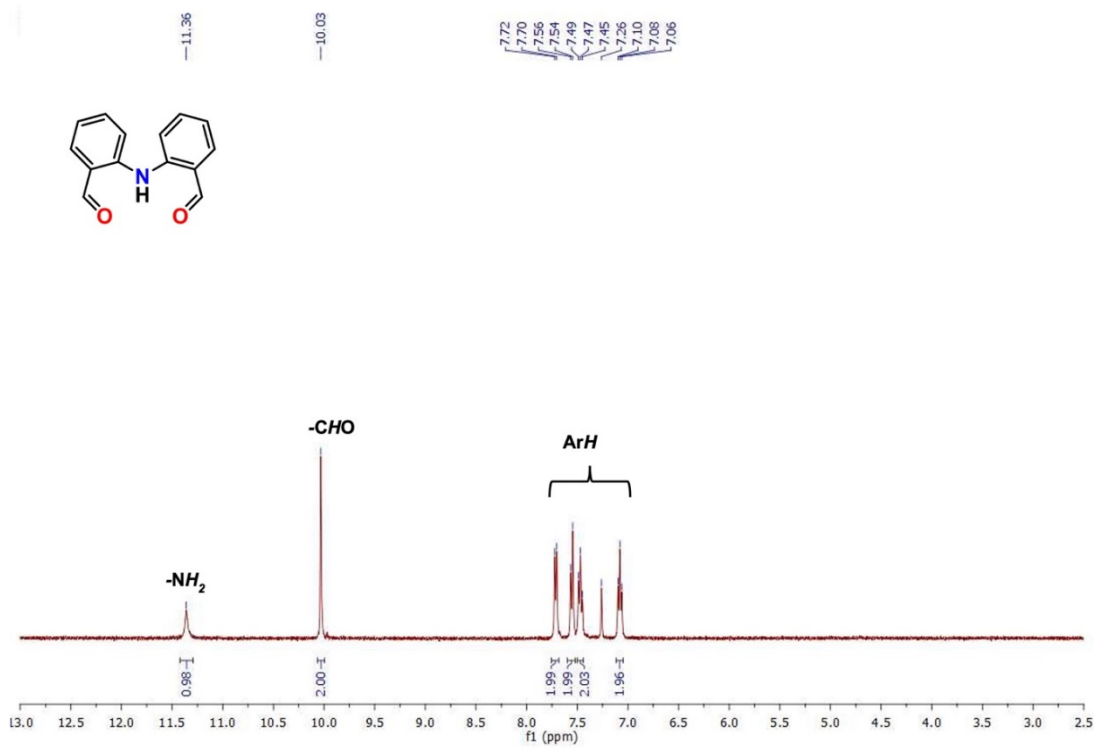

Fig. S3 <sup>1</sup>H NMR spectrum of 2,2'-iminobisbenzaldehyde in CDCl<sub>3</sub>.

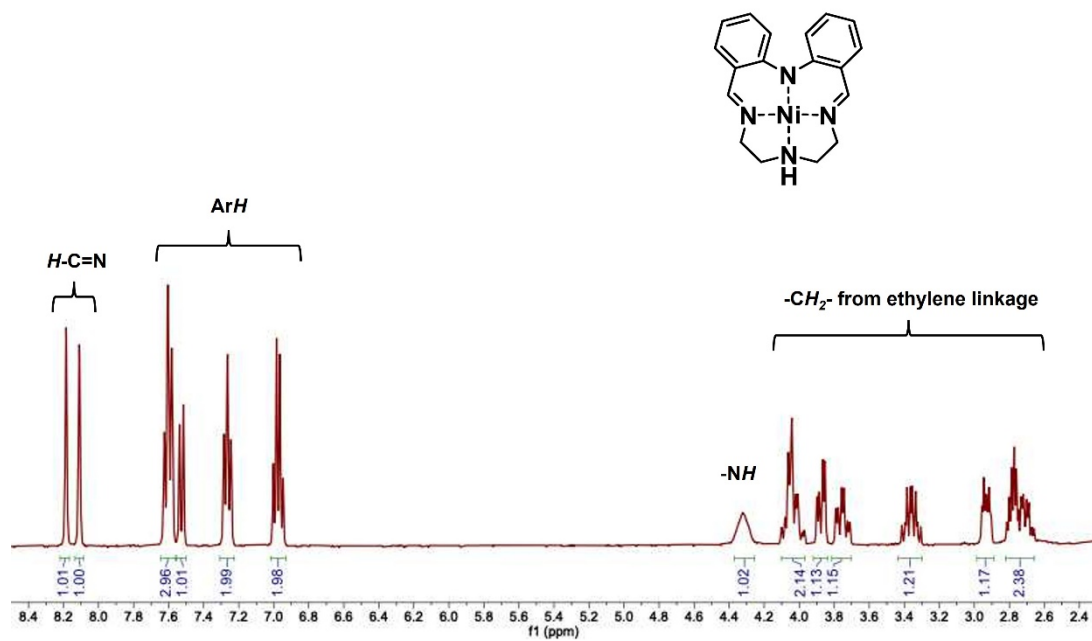

Fig. S4 <sup>1</sup>H NMR spectrum of [1-Ni](BF<sub>4</sub>) in CD<sub>3</sub>CN.

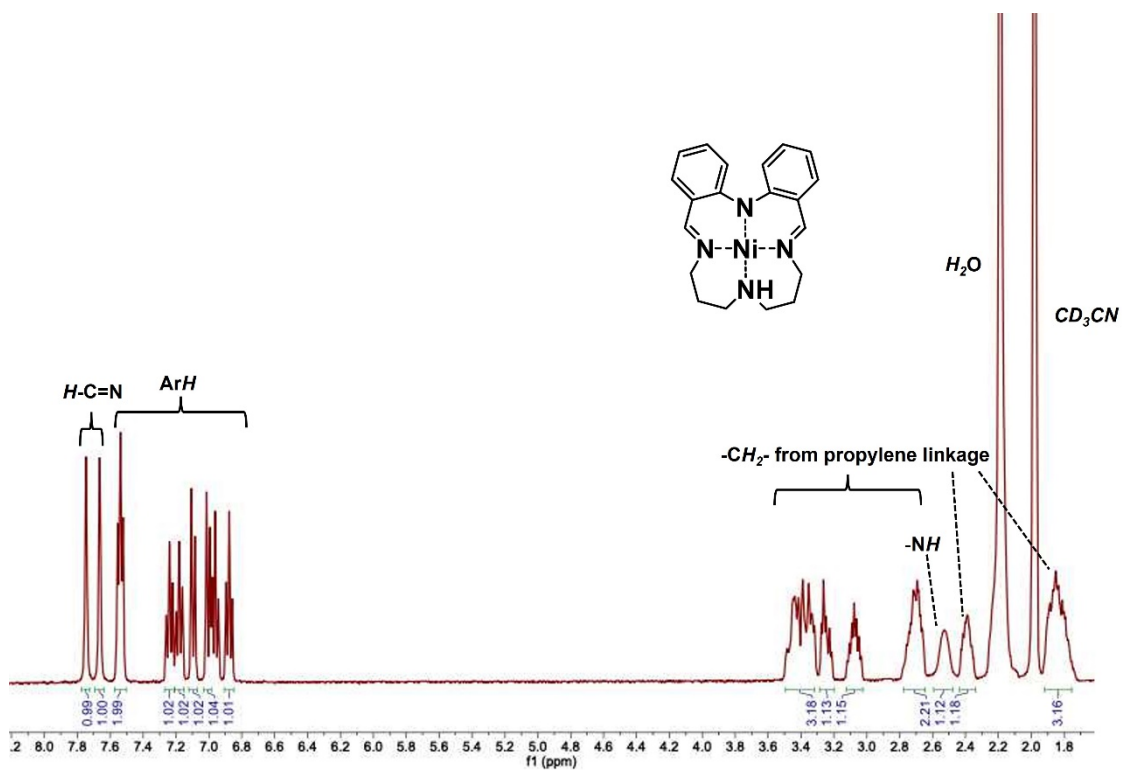

Fig. S5 <sup>1</sup>H NMR spectrum of [2-Ni](BF<sub>4</sub>) in CD<sub>3</sub>CN.

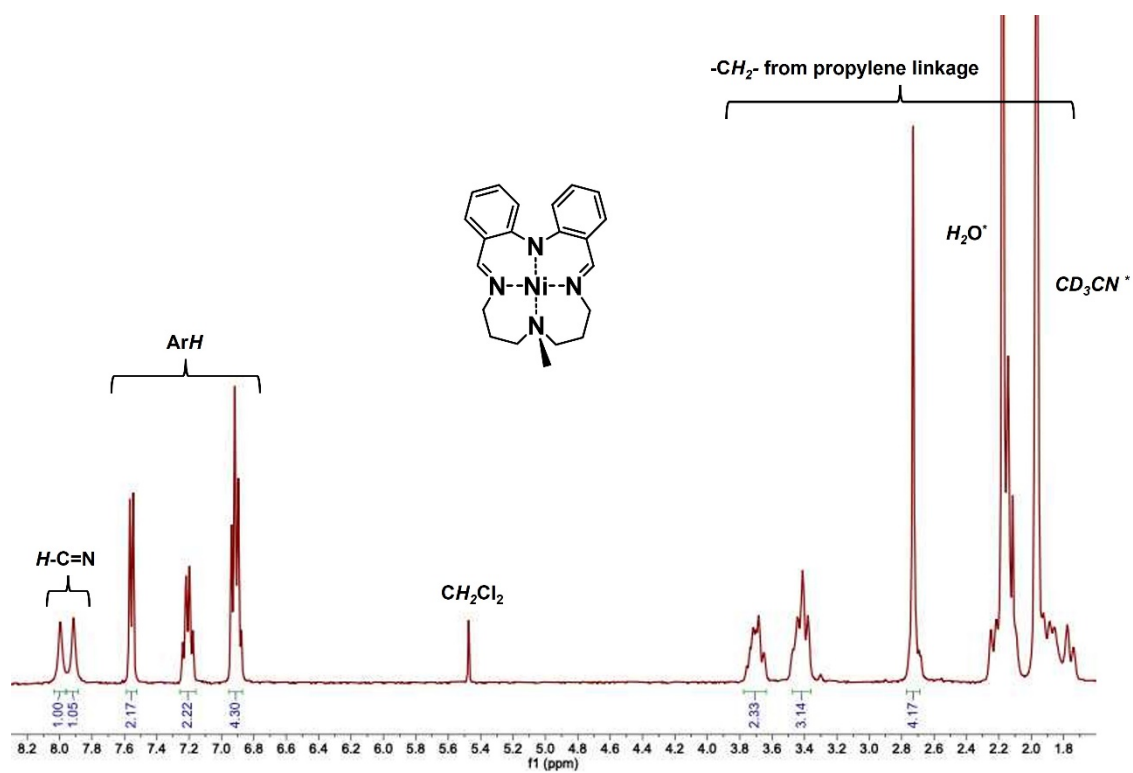

**Fig. S6**  $^1\text{H}$  NMR spectrum of  $[2\text{-Ni}]^{\text{Me}}(\text{BF}_4)$  in  $\text{CD}_3\text{CN}$ .

\* some  $H$  peaks from propylene linkage overlap with the peaks of solvent.

## Mass Spectrum List Report

**Analysis Info**

Analysis Name D:\Data\Data Service\191111\PLMJ046\_RA2\_01\_3478.d  
 Method nv\_pos\_6min\_profile\_wguardcol\_50-1500\_191021.m  
 Sample Name PLMJ046  
 Comment

Acquisition Date 11/11/2019 5:40:19 PM

Operator CU.  
 Instrument / Ser# micrOTOF-Q II 10335

**Acquisition Parameter**

|             |            |                       |           |                  |           |
|-------------|------------|-----------------------|-----------|------------------|-----------|
| Source Type | ESI        | Ion Polarity          | Positive  | Set Nebulizer    | 3.0 Bar   |
| Focus       | Not active | Set Capillary         | 4000 V    | Set Dry Heater   | 200 °C    |
| Scan Begin  | 50 m/z     | Set End Plate Offset  | -500 V    | Set Dry Gas      | 8.0 l/min |
| Scan End    | 1500 m/z   | Set Collision Cell RF | 250.0 Vpp | Set Divert Valve | Waste     |

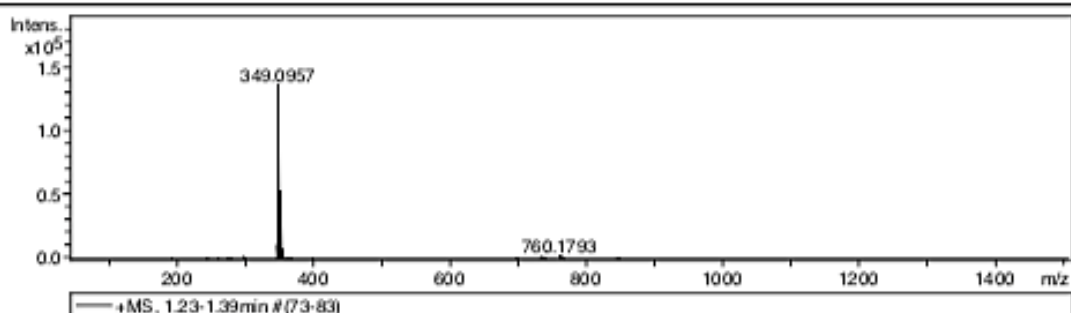

| #  | m/z      | Res.  | S/N     | I      | FWHM   |
|----|----------|-------|---------|--------|--------|
| 1  | 192.9438 | 7767  | 462.7   | 268    | 0.0248 |
| 2  | 243.9411 | 8473  | 243.6   | 331    | 0.0288 |
| 3  | 260.9312 | 9109  | 164.3   | 266    | 0.0286 |
| 4  | 277.9221 | 9014  | 159.6   | 300    | 0.0308 |
| 5  | 298.2739 | 9393  | 575.6   | 1691   | 0.0318 |
| 6  | 299.2777 | 9350  | 108.3   | 328    | 0.0320 |
| 7  | 346.0726 | 9988  | 52.9    | 382    | 0.0346 |
| 8  | 347.0796 | 9845  | 1530.1  | 11148  | 0.0353 |
| 9  | 348.0841 | 9542  | 541.7   | 3996   | 0.0365 |
| 10 | 349.0957 | 8750  | 18229.6 | 136074 | 0.0399 |
| 11 | 350.0978 | 9409  | 3647.1  | 27551  | 0.0372 |
| 12 | 351.0918 | 9184  | 6875.1  | 52542  | 0.0382 |
| 13 | 352.0935 | 9649  | 1629.0  | 12596  | 0.0365 |
| 14 | 353.0898 | 9541  | 994.4   | 7778   | 0.0370 |
| 15 | 354.0919 | 9889  | 202.3   | 1601   | 0.0358 |
| 16 | 355.0883 | 9793  | 225.7   | 1806   | 0.0363 |
| 17 | 356.0916 | 9698  | 50.2    | 407    | 0.0367 |
| 18 | 365.0898 | 9639  | 54.2    | 484    | 0.0379 |
| 19 | 367.0956 | 8069  | 29.7    | 271    | 0.0455 |
| 20 | 733.1599 | 13351 | 262.8   | 1000   | 0.0549 |
| 21 | 734.1652 | 12836 | 103.0   | 395    | 0.0572 |
| 22 | 735.1579 | 13189 | 296.9   | 1141   | 0.0557 |
| 23 | 736.1586 | 13309 | 125.5   | 485    | 0.0553 |
| 24 | 737.1551 | 12689 | 141.6   | 550    | 0.0581 |
| 25 | 760.1793 | 12433 | 599.0   | 2570   | 0.0611 |
| 26 | 761.1810 | 12693 | 258.6   | 1115   | 0.0600 |
| 27 | 762.1769 | 12301 | 516.7   | 2236   | 0.0620 |
| 28 | 763.1775 | 12622 | 228.6   | 994    | 0.0605 |
| 29 | 764.1730 | 12718 | 191.6   | 837    | 0.0601 |
| 30 | 765.1746 | 13720 | 89.2    | 392    | 0.0558 |

**Fig. S7** High resolution mass spectrum of [1-Ni](BF<sub>4</sub>)



## Mass Spectrum List Report

**Analysis Info**

Analysis Name D:\Data\Data Service\191125\PLMJ048\_RA3\_01\_3483.d  
 Method nv\_pos\_6min\_profile\_wguardcol\_50-1500\_191021.m  
 Sample Name PLMJ048  
 Comment

Acquisition Date 11/25/2019 4:38:16 PM

Operator CU.  
 Instrument / Ser# micrOTOF-Q II 10335

**Acquisition Parameter**

|             |            |                       |           |                 |           |
|-------------|------------|-----------------------|-----------|-----------------|-----------|
| Source Type | ESI        | Ion Polarity          | Positive  | Set Nebulizer   | 3.0 Bar   |
| Focus       | Not active | Set Capillary         | 4000 V    | Set Dry Heater  | 200 °C    |
| Scan Begin  | 50 m/z     | Set End Plate Offset  | -500 V    | Set Dry Gas     | 8.0 l/min |
| Scan End    | 1500 m/z   | Set Collision Cell RF | 250.0 Vpp | Set Diver Valve | Waste     |

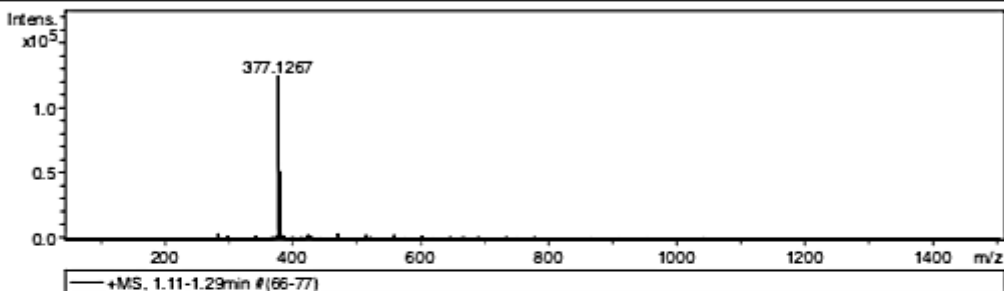

| #  | m/z      | Res.  | S/N    | I      | FWHM   |
|----|----------|-------|--------|--------|--------|
| 1  | 284.3304 | 9040  | 852.4  | 3438   | 0.0315 |
| 2  | 298.2737 | 9064  | 326.9  | 2055   | 0.0329 |
| 3  | 341.2654 | 9880  | 127.5  | 1952   | 0.0345 |
| 4  | 368.4245 | 10305 | 79.2   | 1665   | 0.0358 |
| 5  | 375.1110 | 10005 | 78.2   | 1753   | 0.0375 |
| 6  | 377.1267 | 8803  | 5469.0 | 124724 | 0.0428 |
| 7  | 378.1291 | 9683  | 1203.0 | 27691  | 0.0391 |
| 8  | 379.1223 | 9651  | 2205.5 | 51223  | 0.0393 |
| 9  | 380.1246 | 10072 | 557.9  | 13078  | 0.0377 |
| 10 | 381.1209 | 9948  | 329.4  | 7790   | 0.0383 |
| 11 | 382.1230 | 10224 | 68.0   | 1624   | 0.0374 |
| 12 | 383.1207 | 9893  | 72.8   | 1754   | 0.0387 |
| 13 | 384.1873 | 9507  | 41.4   | 1008   | 0.0404 |
| 14 | 385.2911 | 10034 | 76.1   | 1869   | 0.0384 |
| 15 | 400.3759 | 10348 | 49.2   | 1087   | 0.0387 |
| 16 | 422.1108 | 10717 | 55.9   | 1026   | 0.0394 |
| 17 | 425.3596 | 10554 | 185.1  | 3287   | 0.0403 |
| 18 | 428.4082 | 10419 | 72.2   | 1247   | 0.0411 |
| 19 | 429.3166 | 10410 | 61.7   | 1056   | 0.0412 |
| 20 | 469.3851 | 10926 | 379.0  | 3869   | 0.0430 |
| 21 | 470.3884 | 10832 | 111.7  | 1122   | 0.0434 |
| 22 | 513.4115 | 10772 | 389.5  | 3144   | 0.0477 |
| 23 | 514.4152 | 11333 | 126.1  | 1020   | 0.0454 |
| 24 | 557.4384 | 11798 | 339.0  | 2818   | 0.0473 |
| 25 | 601.4650 | 11701 | 232.1  | 1991   | 0.0514 |
| 26 | 645.4893 | 12497 | 192.9  | 1709   | 0.0517 |
| 27 | 666.6385 | 12185 | 173.8  | 1564   | 0.0547 |
| 28 | 689.5151 | 12424 | 165.8  | 1452   | 0.0555 |
| 29 | 733.5421 | 12982 | 183.7  | 1399   | 0.0565 |
| 30 | 777.5684 | 12950 | 158.6  | 1036   | 0.0600 |

Fig. S8 High resolution mass spectrum of [2-Ni](BF<sub>4</sub>)

## Mass Spectrum List Report

**Analysis Info**

|               |                                                          |                   |                       |
|---------------|----------------------------------------------------------|-------------------|-----------------------|
| Analysis Name | D:\Data\Data Service\201221\PLMJ079_NiN4Me_RC2_01_5092.d | Acquisition Date  | 12/21/2020 3:44:40 PM |
| Method        | mv_pos_5min_profile_190214.m                             | Operator          | CU.                   |
| Sample Name   | PLMJ079_NiN4Me                                           | Instrument / Ser# | micrOTOF-Q II 10335   |
| Comment       |                                                          |                   |                       |

**Acquisition Parameter**

|             |            |                       |           |
|-------------|------------|-----------------------|-----------|
| Source Type | ESI        | Ion Polarity          | Positive  |
| Focus       | Not active | Set Capillary         | 4000 V    |
| Scan Begin  | 100 m/z    | Set End Plate Offset  | -500 V    |
| Scan End    | 1500 m/z   | Set Collision Cell RF | 250.0 Vpp |
|             |            | Set Nebulizer         | 3.0 Bar   |
|             |            | Set Dry Heater        | 200 °C    |
|             |            | Set Dry Gas           | 8.0 l/min |
|             |            | Set Divert Valve      | Waste     |

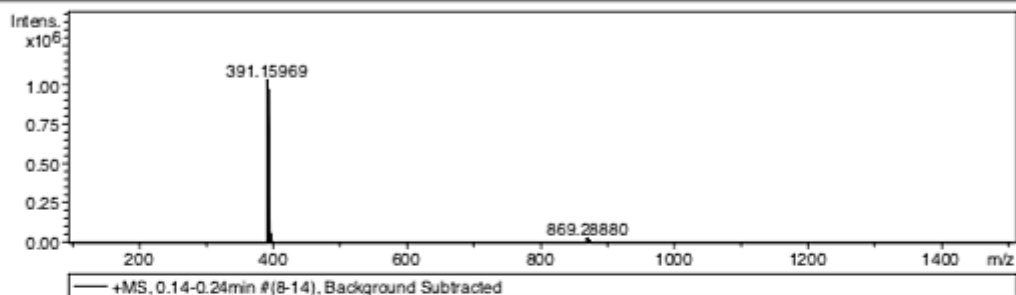

| #  | m/z        | Res.  | S/N   | I       | FWHM    |
|----|------------|-------|-------|---------|---------|
| 1  | 195.57037  | 6894  | 167.9 | 1722    | 0.02837 |
| 2  | 196.07397  | 6746  | 329.1 | 3363    | 0.02907 |
| 3  | 196.57268  | 6441  | 142.5 | 1459    | 0.03052 |
| 4  | 197.07094  | 6859  | 141.9 | 1451    | 0.02873 |
| 5  | 391.15969  | 3156  | 196.8 | 1033315 | 0.12395 |
| 6  | 392.14840  | 6414  | 155.1 | 827626  | 0.06114 |
| 7  | 393.14618  | 4835  | 179.7 | 973995  | 0.08131 |
| 8  | 394.14117  | 8152  | 86.0  | 473290  | 0.04835 |
| 9  | 395.13697  | 8588  | 51.1  | 285388  | 0.04601 |
| 10 | 397.13349  | 9506  | 10.3  | 59077   | 0.04178 |
| 11 | 868.29041  | 11016 | 11.8  | 8178    | 0.07882 |
| 12 | 869.28880  | 10413 | 49.5  | 34623   | 0.08348 |
| 13 | 870.28925  | 10866 | 32.4  | 22957   | 0.08009 |
| 14 | 871.28523  | 10567 | 44.2  | 31777   | 0.08245 |
| 15 | 872.28516  | 10800 | 22.4  | 16296   | 0.08076 |
| 16 | 873.28234  | 10732 | 16.3  | 12062   | 0.08137 |
| 17 | 1349.43196 | 11821 | 25.5  | 1120    | 0.11415 |

**Fig. S9** High resolution mass spectrum of  $[2\text{-Ni}]^{\text{Me}}(\text{BF}_4)$ .

## Electrochemical Studies in Non-aqueous Electrolyte

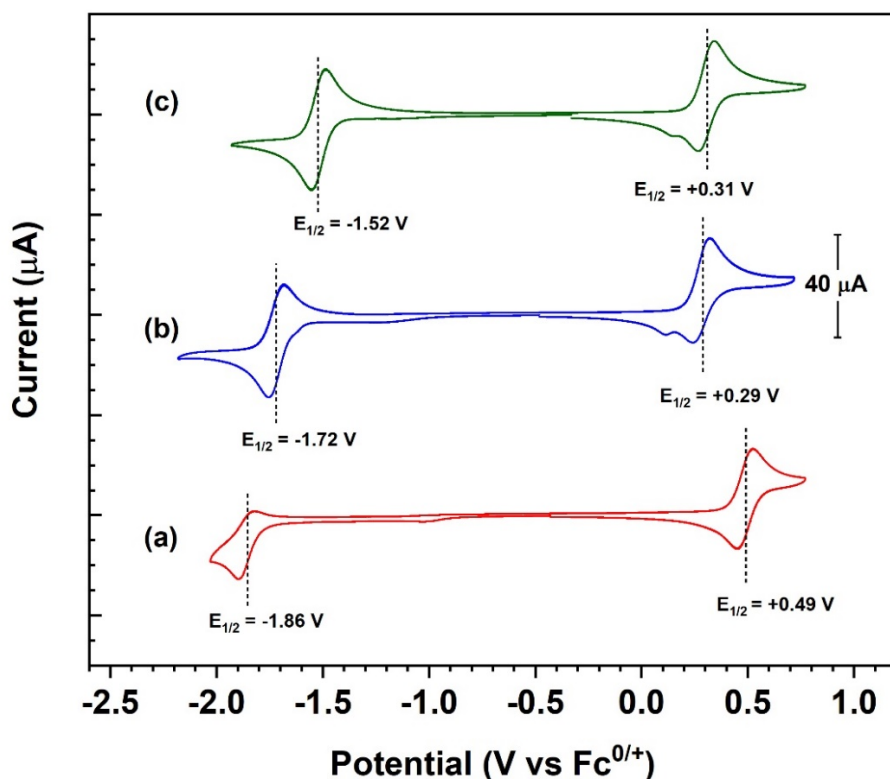

**Fig. S10** CVs of 1 mM (a) 1-Ni, (b) 2-Ni and (c)  $[2-Ni]^{Me}$  recorded in  $N_2$ -saturated  $CH_3CN/0.1 M Bu_4NPF_6$  solution ( $v = 0.1 V/s$ , glassy carbon electrode).

**Table S1** Electrochemical data of Schiff base nickel macrocycles. <sup>[a]</sup>

| Complex       | $E_{pc1}$ (V) | $E_{pa1}$ (V) | $E_{1/2}$ (V) <sup>[b]</sup><br>[ $\Delta E_p$ (mV)] <sup>[c]</sup> | $E_{pc2}$ (V) | $E_{pa2}$ (V) | $E_{1/2}$ (V) <sup>[b]</sup><br>[ $\Delta E_p$ (mV)] <sup>[c]</sup> |
|---------------|---------------|---------------|---------------------------------------------------------------------|---------------|---------------|---------------------------------------------------------------------|
| 1-Ni          | +0.45         | +0.52         | +0.49 [73]                                                          | -1.89         | -1.82         | -1.86 [80]                                                          |
| 2-Ni          | +0.25         | +0.33         | +0.29 [82]                                                          | -1.75         | -1.68         | -1.72 [71]                                                          |
| $[2-Ni]^{Me}$ | +0.27         | +0.34         | +0.31 [76]                                                          | -1.56         | -1.49         | -1.52 [66]                                                          |

<sup>[a]</sup> All voltammograms were recorded in  $CH_3CN$ ; the potentials are reported vs. the  $Fc^{+/0}$  couple. Conditions: scan rate = 100 mV/s, compound (1 mM),  $Bu_4NPF_6$  (0.1 M), glassy carbon working electrode. Under these conditions we found  $\Delta E_p (Fc^{+/0}) = 65 mV$ . <sup>[b]</sup>  $E_{1/2} = (E_{pc} + E_{pa})/2$ , when  $E_{pc}$  = cathodic peak potential and  $E_{pa}$  = anodic peak potential. <sup>[c]</sup>  $\Delta E_p = |E_{pc} - E_{pa}|$ .

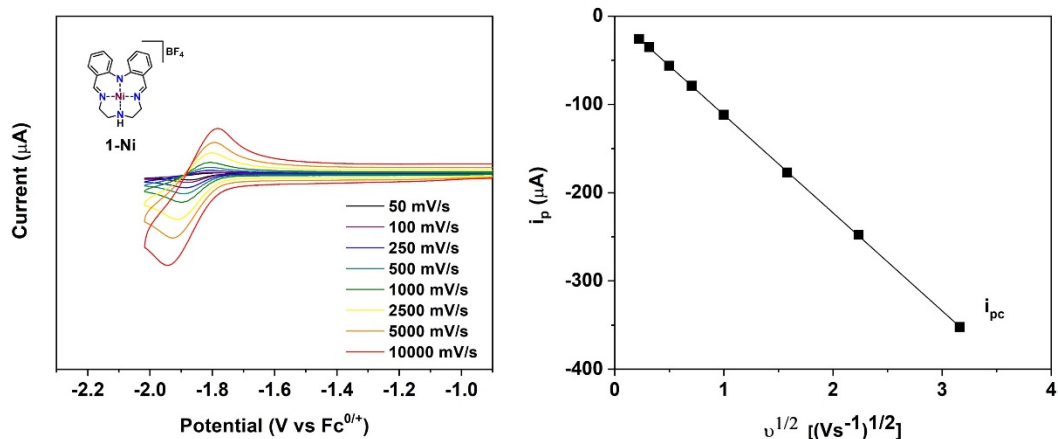

**Fig. S11** CVs of **1-Ni** in CH<sub>3</sub>CN at different scan rate and plots of reductive current vs. the square root of the scan rate of **1-Ni** in CH<sub>3</sub>CN at E = -1.86 V vs. Fc<sup>+0</sup>.

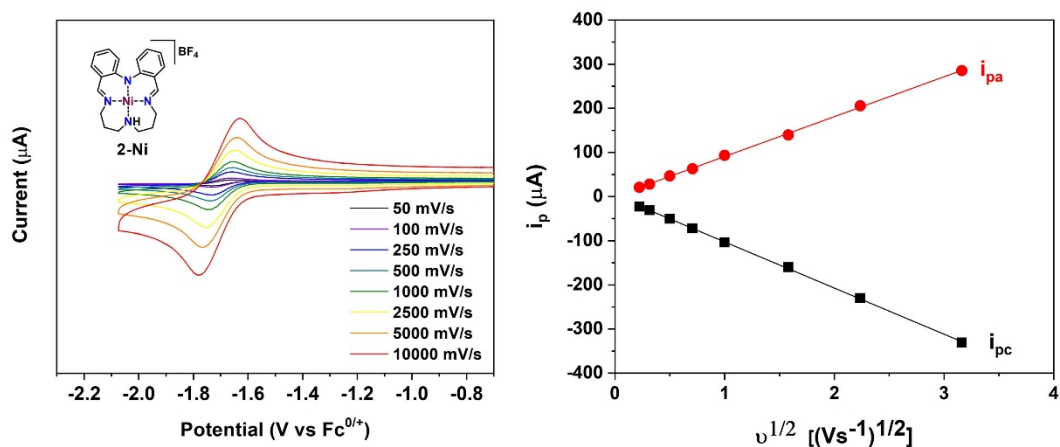

**Fig. S12** CVs of **2-Ni** in CH<sub>3</sub>CN at different scan rate and plots of reductive and oxidative currents vs. the square root of the scan rate of **2-Ni** in CH<sub>3</sub>CN at E = -1.72 V vs. Fc<sup>+0</sup>.

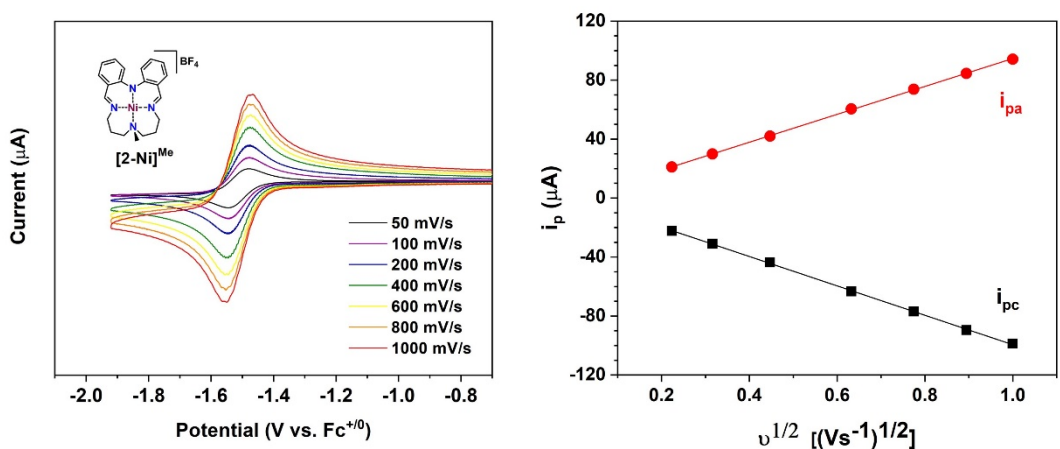

**Fig. S13** CVs of **[2-Ni]<sup>Me</sup>** in CH<sub>3</sub>CN at different scan rate and plots of reductive and oxidative currents vs. the square root of the scan rate of **[2-Ni]<sup>Me</sup>** in CH<sub>3</sub>CN at E = -1.52 V vs. Fc<sup>+0</sup>.

**Table S2** Redox potential of Ni<sup>II</sup>/Ni<sup>I</sup> couples of **1-Ni** at different scan rates.

| Scan rate (V s <sup>-1</sup> ) | E <sub>pc</sub> (V) | E <sub>pa</sub> (V) | E <sub>1/2</sub> (V) |
|--------------------------------|---------------------|---------------------|----------------------|
| 0.05                           | -1.89               | -1.82               | -1.85                |
| 0.1                            | -1.89               | -1.82               | -1.85                |
| 0.25                           | -1.90               | -1.81               | -1.85                |
| 0.5                            | -1.90               | -1.81               | -1.85                |
| 1                              | -1.92               | -1.80               | -1.85                |
| 2.5                            | -1.92               | -1.79               | -1.85                |
| 5                              | -1.92               | -1.79               | -1.85                |
| 10                             | -1.95               | -1.78               | -1.86                |

**Table S3** Reductive current of Ni<sup>II</sup>/Ni<sup>I</sup> couples of **1-Ni** at different scan rates.

| Scan rate (V s <sup>-1</sup> ) | i <sub>pc</sub> (μA) | i <sub>pa</sub> (μA) | i <sub>pc</sub> / i <sub>pa</sub> |
|--------------------------------|----------------------|----------------------|-----------------------------------|
| 0.05                           | 23.01                | -                    | -                                 |
| 0.1                            | 30.96                | -                    | -                                 |
| 0.25                           | 50.35                | -                    | -                                 |
| 0.5                            | 72.12                | -                    | -                                 |
| 1                              | 104.10               | -                    | -                                 |
| 2.5                            | 160.20               | -                    | -                                 |
| 5                              | 230.50               | -                    | -                                 |
| 10                             | 330.75               | -                    | -                                 |

**Table S4** Redox potential of Ni<sup>II</sup>/Ni<sup>I</sup> couples of **2-Ni** at different scan rates.

| Scan rate (V s <sup>-1</sup> ) | E <sub>pc</sub> (V) | E <sub>pa</sub> (V) | E <sub>1/2</sub> (V) |
|--------------------------------|---------------------|---------------------|----------------------|
| 0.05                           | -1.75               | -1.68               | -1.72                |
| 0.1                            | -1.75               | -1.68               | -1.72                |
| 0.25                           | -1.75               | -1.68               | -1.72                |
| 0.5                            | -1.75               | -1.68               | -1.72                |
| 1                              | -1.76               | -1.67               | -1.72                |
| 2.5                            | -1.76               | -1.66               | -1.71                |
| 5                              | -1.77               | -1.66               | -1.72                |
| 10                             | -1.78               | -1.65               | -1.72                |

**Table S5** Reductive and oxidative current of Ni<sup>II</sup>/Ni<sup>I</sup> couples of **2-Ni** at different scan rates.

| Scan rate (V s <sup>-1</sup> ) | i <sub>pc</sub> (μA) | i <sub>pa</sub> (μA) | i <sub>pc</sub> / i <sub>pa</sub> |
|--------------------------------|----------------------|----------------------|-----------------------------------|
| 0.05                           | 23.01                | 20.84                | 1.10                              |
| 0.1                            | 30.96                | 28.26                | 1.10                              |
| 0.25                           | 50.35                | 46.62                | 1.08                              |
| 0.5                            | 72.12                | 63.05                | 1.14                              |
| 1                              | 104.10               | 93.20                | 1.12                              |
| 2.5                            | 160.20               | 139.30               | 1.15                              |
| 5                              | 230.50               | 205.80               | 1.12                              |
| 10                             | 330.75               | 285.13               | 1.16                              |

**Table S6** Redox potential of Ni<sup>II</sup>/Ni<sup>I</sup> couples of [2-Ni]<sup>Me</sup> at different scan rates.

| Scan rate (V s <sup>-1</sup> ) | E <sub>pc</sub> (V) | E <sub>pa</sub> (V) | E <sub>1/2</sub> (V) |
|--------------------------------|---------------------|---------------------|----------------------|
| 0.05                           | -1.55               | -1.49               | -1.52                |
| 0.1                            | -1.55               | -1.49               | -1.52                |
| 0.2                            | -1.56               | -1.49               | -1.53                |
| 0.4                            | -1.56               | -1.48               | -1.52                |
| 0.6                            | -1.56               | -1.48               | -1.52                |
| 0.8                            | -1.56               | -1.49               | -1.53                |
| 1.0                            | -1.56               | -1.48               | -1.52                |

**Table S7** Reductive and oxidative current of Ni<sup>II</sup>/Ni<sup>I</sup> couples of [2-Ni]<sup>Me</sup> at different scan rates.

| Scan rate (V s <sup>-1</sup> ) | i <sub>pc</sub> (μA) | i <sub>pa</sub> (μA) | i <sub>pc</sub> / i <sub>pa</sub> |
|--------------------------------|----------------------|----------------------|-----------------------------------|
| 0.05                           | 22.32                | 21.12                | 1.05                              |
| 0.1                            | 31.01                | 29.83                | 1.04                              |
| 0.2                            | 43.74                | 42.00                | 1.04                              |
| 0.4                            | 63.39                | 60.45                | 1.05                              |
| 0.6                            | 76.92                | 73.76                | 1.04                              |
| 0.8                            | 89.57                | 84.54                | 1.06                              |
| 1.0                            | 98.81                | 94.22                | 1.05                              |

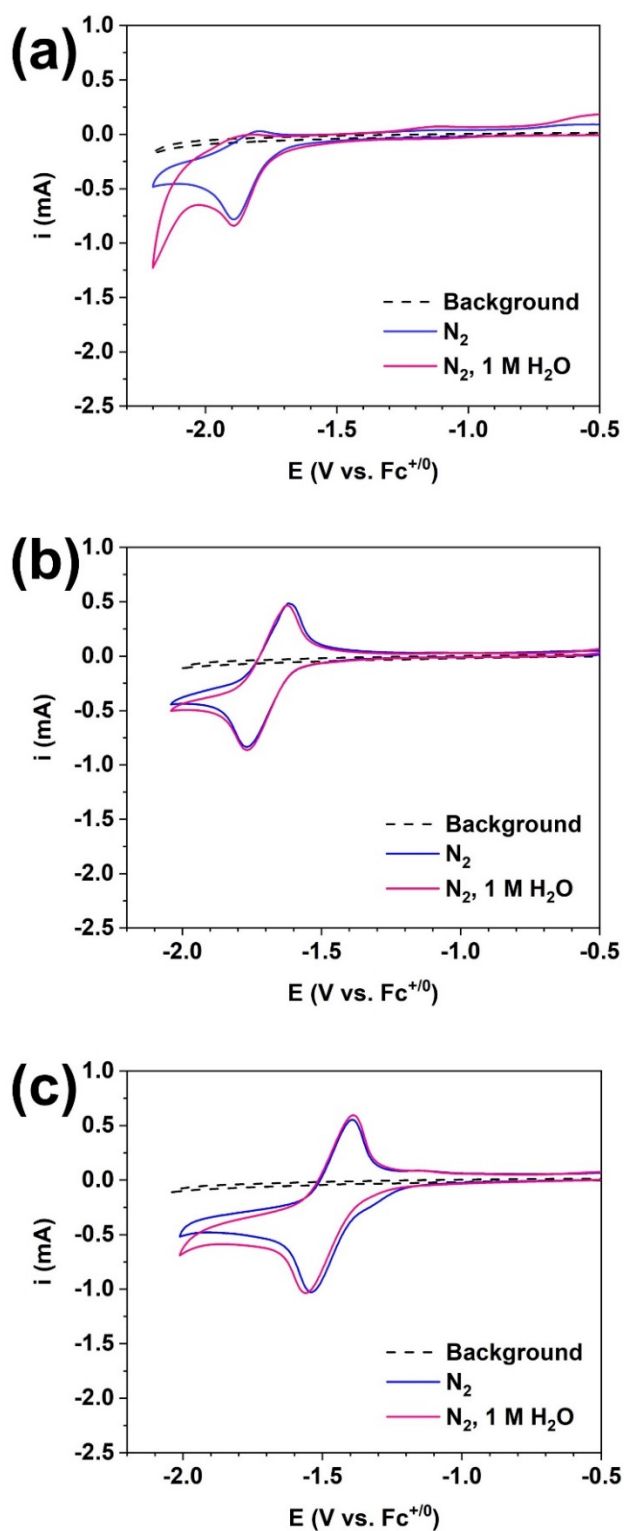

**Fig. S14** Cyclic voltammograms of (a) **1-Ni**, (b) **2-Ni**, and (c) **[2-Ni]<sup>Me</sup>** at 1 mM concentration in 0.1 M  $\text{NBu}_4\text{PF}_6/\text{CH}_3\text{CN}$  ( $v = 0.1 \text{ V/s}$ ) under  $\text{N}_2$  (blue) and under  $\text{N}_2$  with 1 M  $\text{H}_2\text{O}$  (pink). Background signals were collected under  $\text{CO}_2$ -saturated 0.1 M  $\text{NBu}_4\text{PF}_6/\text{CH}_3\text{CN}$  and illustrated in black-dashed line.

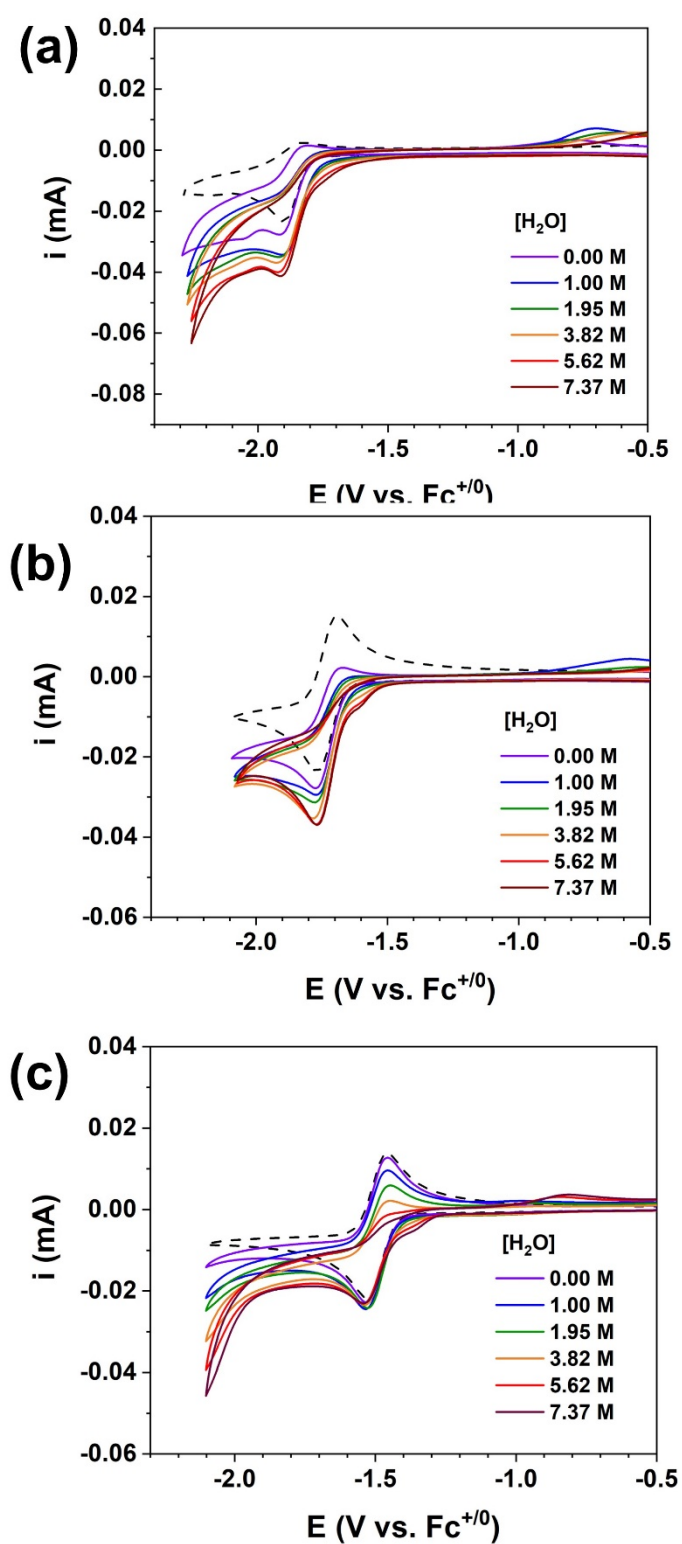

**Fig. S15** Cyclic voltammograms (CVs) of (a) 1-Ni, (b) 2-Ni and (c) [2-Ni]<sup>Me</sup> in CO<sub>2</sub>-saturated CH<sub>3</sub>CN/ 0.1 M Bu<sub>4</sub>NPF<sub>6</sub> with the various concentration of H<sub>2</sub>O. CVs in N<sub>2</sub>-saturated CH<sub>3</sub>CN/ 0.1 M Bu<sub>4</sub>NPF<sub>6</sub> were illustrated in the broken line. Glassy carbon (Area = 0.071 cm<sup>2</sup>) was used as a working electrode.



## UV-visible Spectra of Ni Complexes Before and After Adsorption on NG

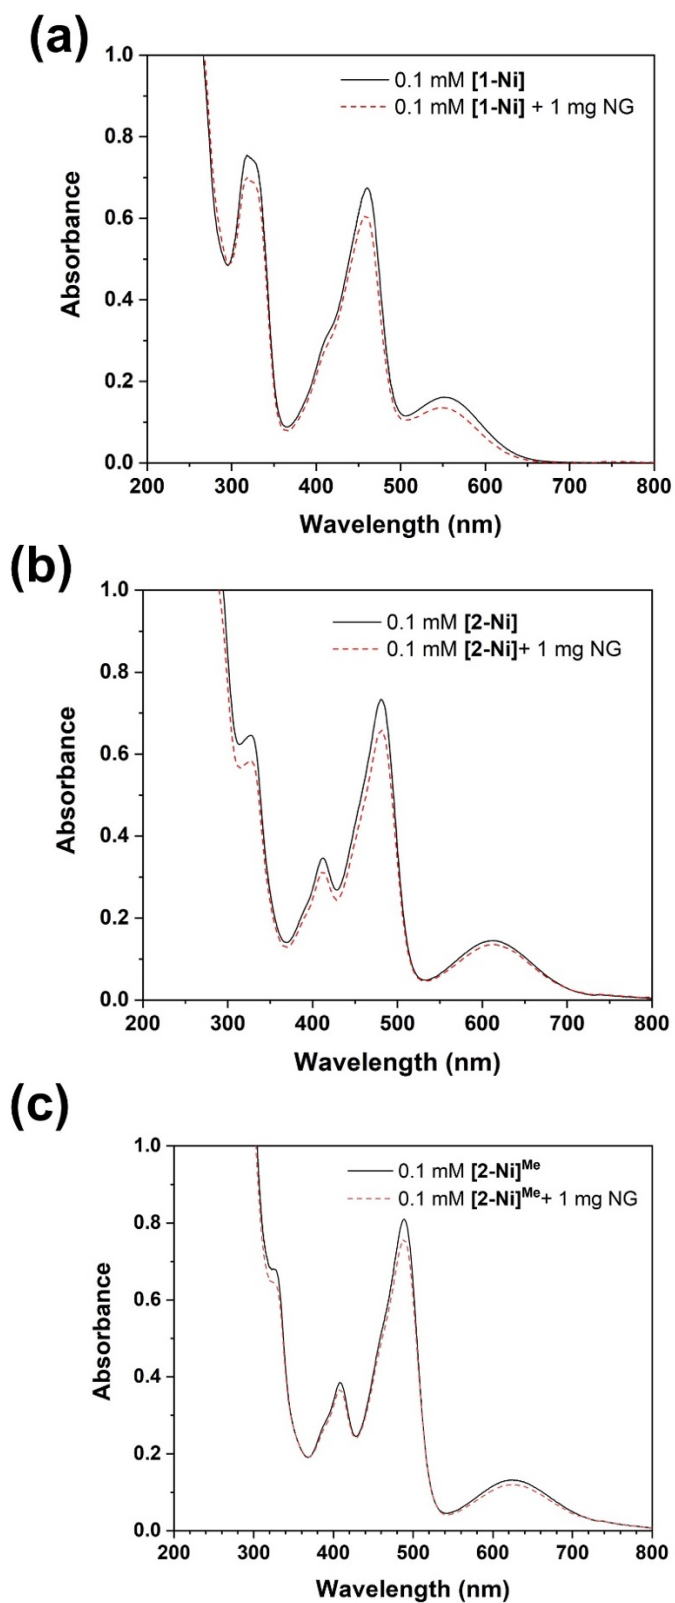

**Fig. S16** UV-visible spectra of (a) **1-Ni**, (b) **2-Ni** and (c) **[2-Ni]<sup>Me</sup>** complexes before (black solid line) and after (red dotted line) adsorption on NG.

## Scanning Electron Microscopic Images

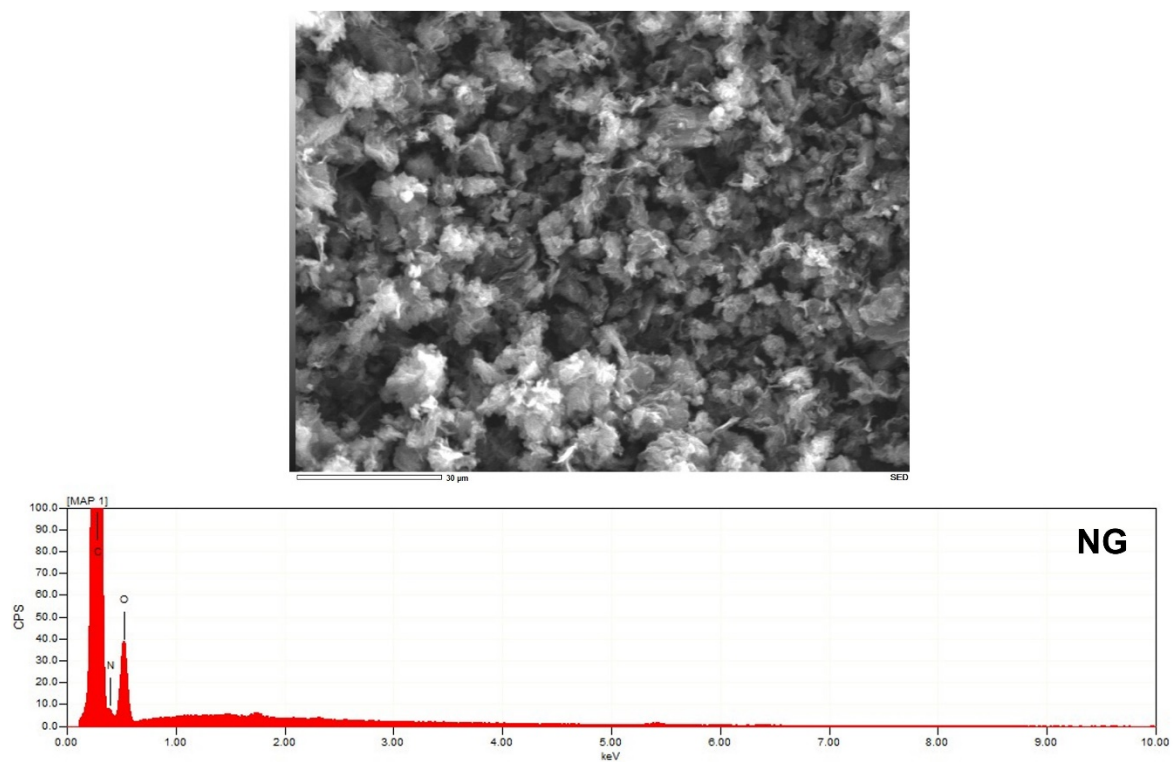

**Fig. S17** Scanning electron microscopy (SEM) image of N-doped graphene at 1000-fold magnification and energy dispersive X-ray spectrum (EDS) of NG.

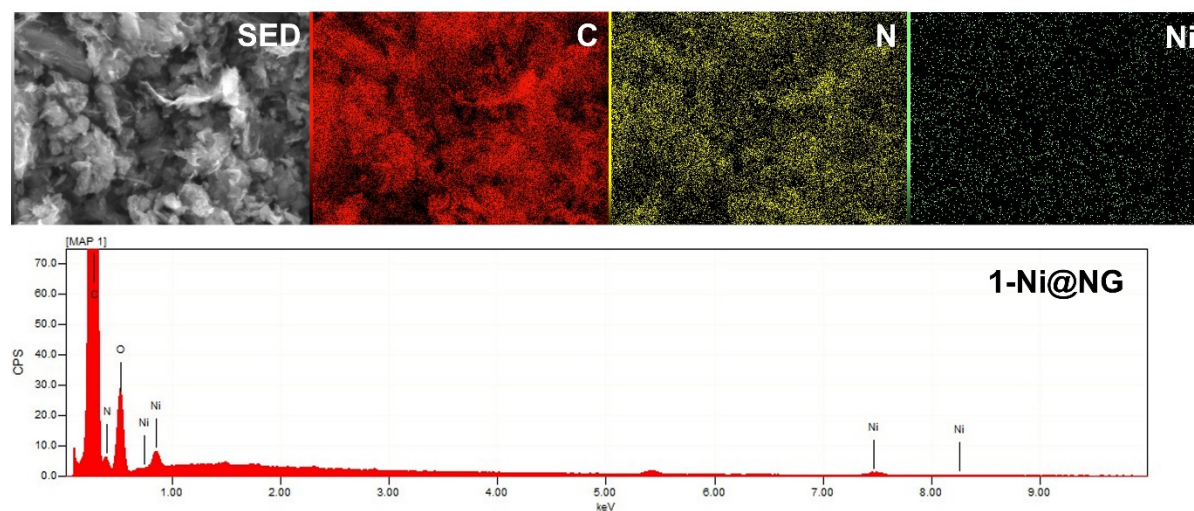

**Fig. S18** 3000-fold-magnified SEM images coupled with elemental mapping of 1-Ni@NG. C (red), N (yellow), Ni (green). EDS spectrum of 1-Ni@NG.

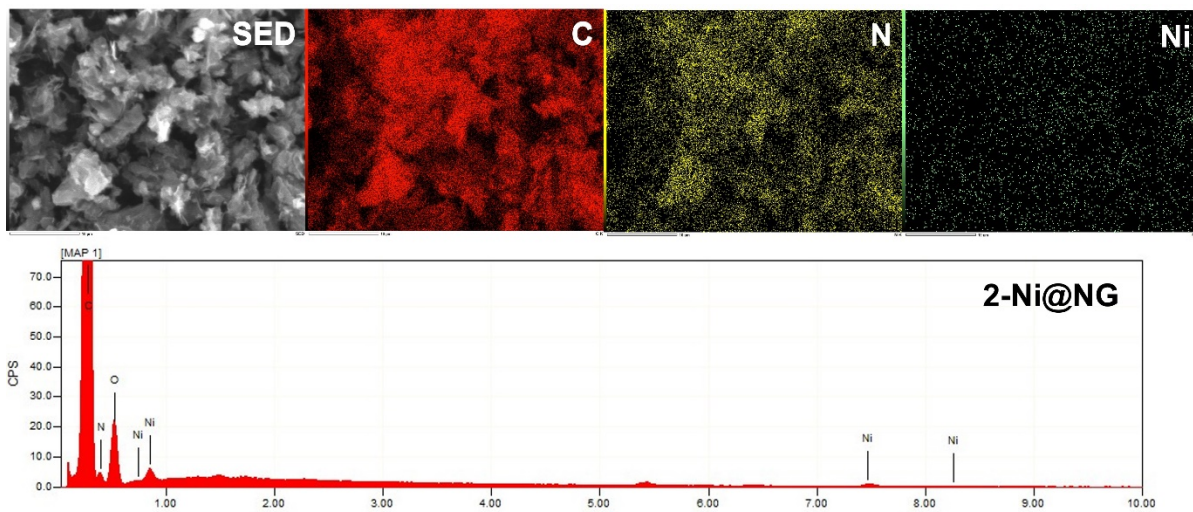

**Fig. S19** 3000-fold-magnified SEM images coupled with elemental mapping of **2-Ni@NG**. C (red), N (yellow), Ni (green). EDS spectrum of **2-Ni@NG**.

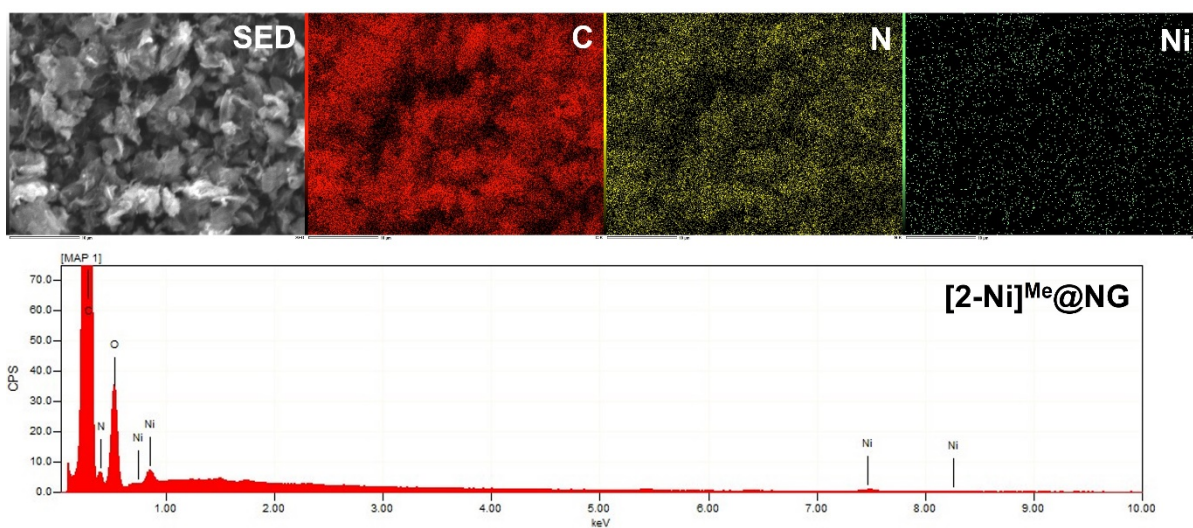

**Fig. S20** 3000-fold-magnified SEM images coupled with elemental mapping of **[2-Ni]<sup>Me</sup>@NG**. C (red), N (yellow), Ni (green). EDS spectrum of **[2-Ni]<sup>Me</sup>@NG**.

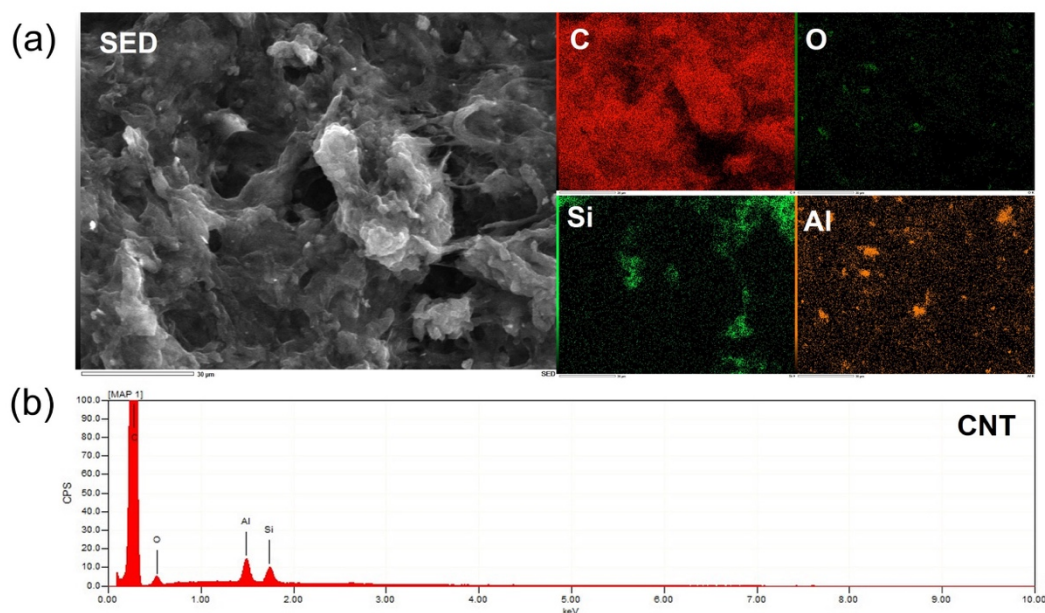

**Fig. S21** (a) Scanning electron microscopic (SEM) image of pristine CNT and elemental mapping (C = red, O = dark green, Si = light green, Al = orange). (b) Energy dispersive X-ray spectroscopy (EDS) of pristine CNT. Silicon wafer was used as a holder for sample preparation.

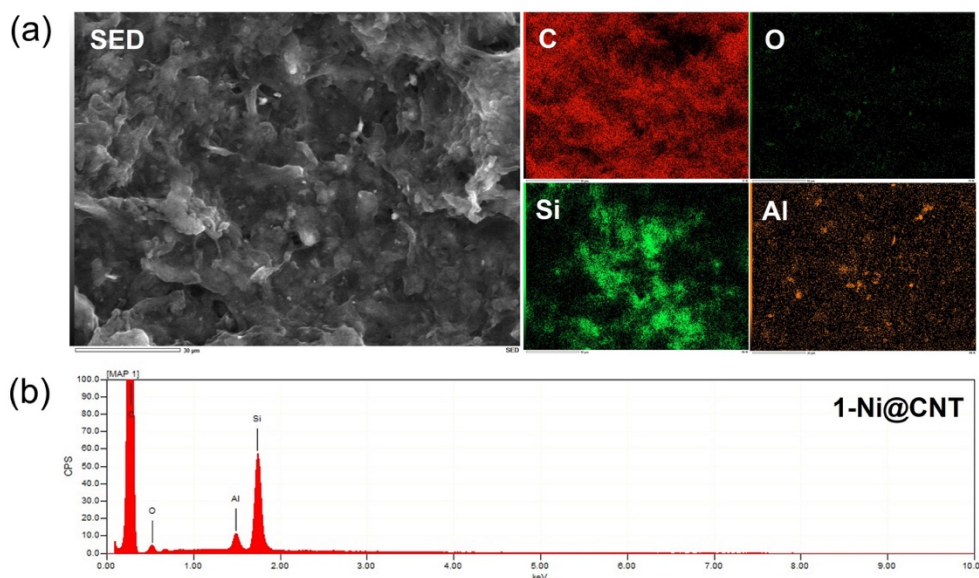

**Fig. S22** (a) Scanning electron microscopic (SEM) image of 1-Ni@CNT and elemental mapping (C = red, O = dark green, Si = light green, Al = orange). (b) Energy dispersive X-ray spectroscopy (EDS) of 1-Ni@CNT. Silicon wafer was used as a holder for sample preparation.

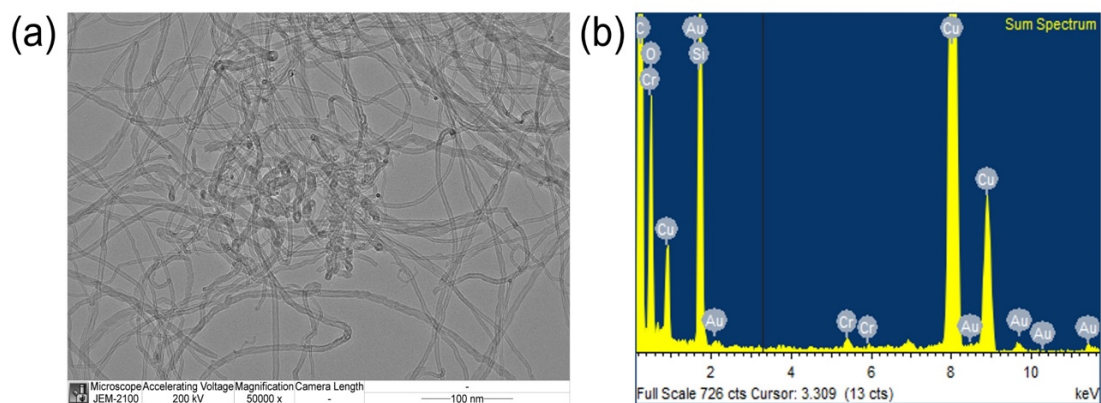

**Fig. S23** (a) Transmission electron microscopic (TEM) image of **1-Ni@CNT**. (b) Energy dispersive X-ray spectroscopy (EDS) of **1-Ni@CNT**. Cu grid was used as a holder for sample preparation.

## Electrochemical Studies in Aqueous Electrolyte

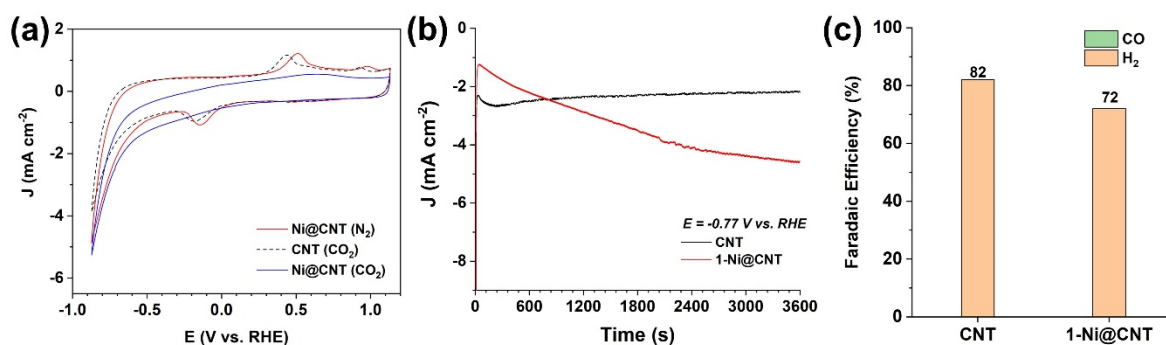

**Fig. S24** (a) Cyclic voltammograms of CNT and **1-Ni@CNT** in 0.5 M NaHCO<sub>3</sub>. (b) Chronoamperometric measurement of CNT and **1-Ni@CNT** in CO<sub>2</sub>-saturated 0.5 M NaHCO<sub>3</sub> (pH = 7.3) for 1 h. (c) Faradaic efficiency of CNT and **1-Ni@CNT** showing only H<sub>2</sub> was observed during the bulk electrolysis.

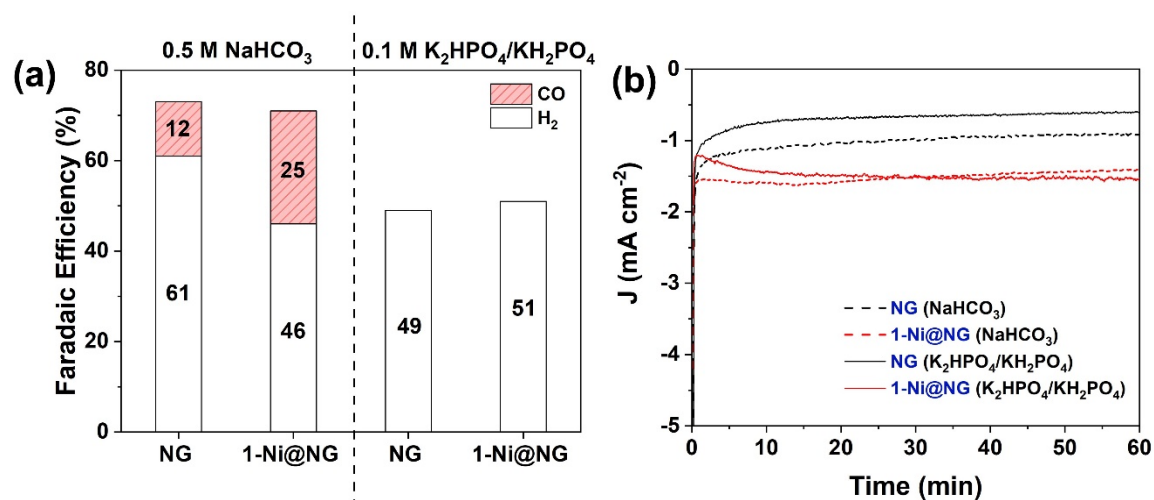

**Fig. S25** (a) Faradaic efficiencies and (b) current-time profiles for 1 h-controlled potential electrolysis at  $-0.67$  V vs. RHE in N<sub>2</sub>-saturated 0.1 M K<sub>2</sub>HPO<sub>4</sub>/KH<sub>2</sub>PO<sub>4</sub> (pH 8.1) of NG (black solid line) and **1-Ni@NG** (red solid line) versus in N<sub>2</sub>-saturated 0.5 M NaHCO<sub>3</sub> (pH 8.7) of **NG** (black dotted line) and **1-Ni@NG** (red dotted line).

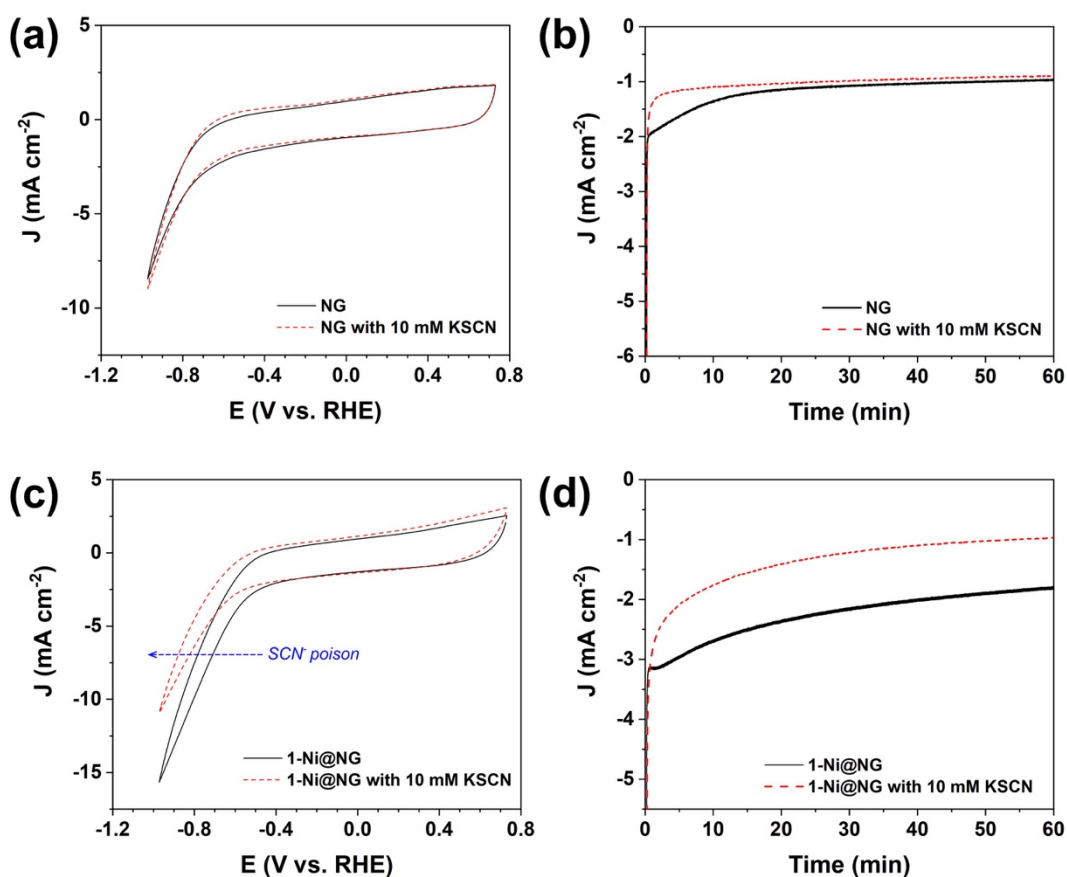

**Fig. S26** KSCN poisoning test. (a) and (c) Cyclic voltammograms of NG and **1-Ni@NG** with and without 10 mM KSCN in 0.5 M NaHCO<sub>3</sub>. (b) and (d) Current-time profiles of **NG** and **1-Ni@NG** with (red trace) and without (black trace) 10 mM KSCN in 0.5 M NaHCO<sub>3</sub>.

**Table S8** Electrochemical CO<sub>2</sub> reduction in the presence and absence of 10 mM KSCN at -0.67 V vs. RHE for 1 h

| Catalysts | [KSCN] | Average Current Density (mA cm <sup>-2</sup> ) | %FE(CO) | CO (μmol) |
|-----------|--------|------------------------------------------------|---------|-----------|
| NG        | 0 mM   | 1.1                                            | 22      | 4.5       |
|           | 10 mM  | 1.0                                            | 21      | 4.1       |
| 1-Ni@NG   | 0 mM   | 2.2                                            | 81      | 37.8      |
|           | 10 mM  | 1.4                                            | 68      | 17.6      |

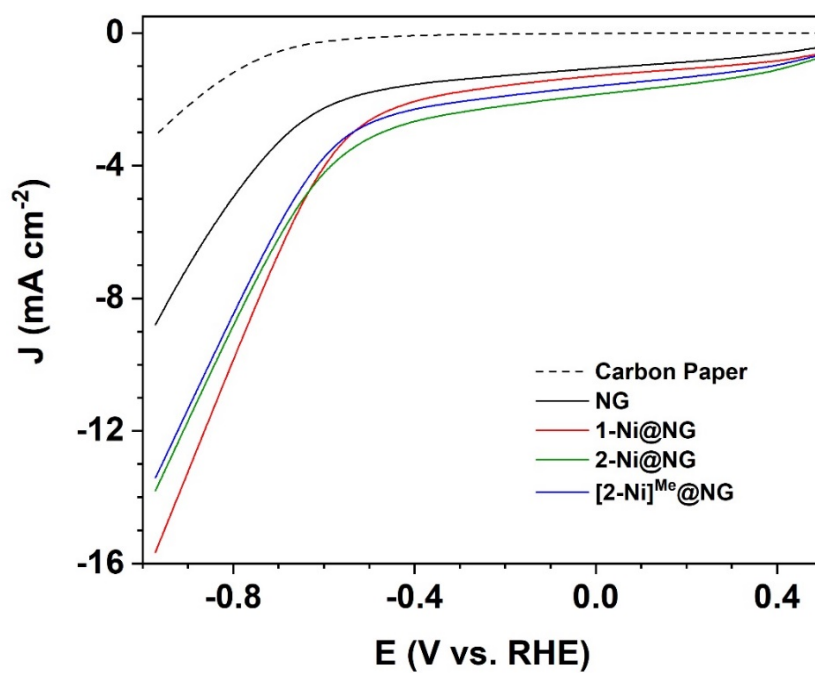

**Fig. S27** Linear sweep voltammetry (LSV) in CO<sub>2</sub>-saturated 0.5 M NaHCO<sub>3</sub> for carbon paper (black dotted line), NG (black solid line), **1-Ni@NG** (red solid line), **2-Ni@NG** (green solid line), and **[2-Ni]<sup>Me</sup>@NG** (blue solid line) at the scan rate of 0.05 V/s.



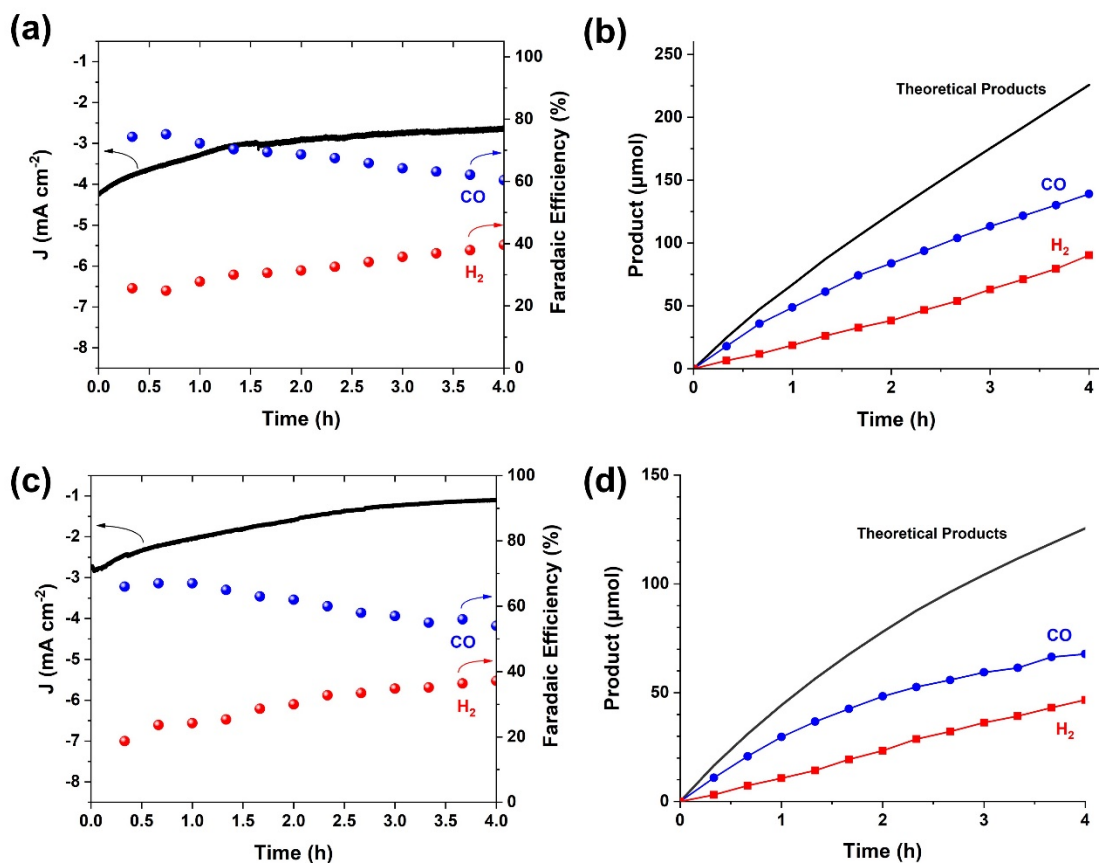

**Fig. S28** Current-density time profiles and faradaic efficiencies of CO (blue) and H<sub>2</sub> (red) evolution in controlled potential electrolysis at -0.67 V vs. RHE ( $\eta = 0.56$  V) in CO<sub>2</sub>-saturated 0.5 M NaHCO<sub>3</sub> using (a) 2-Ni@NG and (b) [2-Ni]<sup>Me</sup>@NG. Time courses of the moles of CO (blue) and H<sub>2</sub> (red) production from bulk electrolysis and theoretical product yields (black) calculated from  $e^-/2$  of charge required during the bulk electrolysis for (c) 2-Ni@NG and (d) [2-Ni]<sup>Me</sup>@NG.

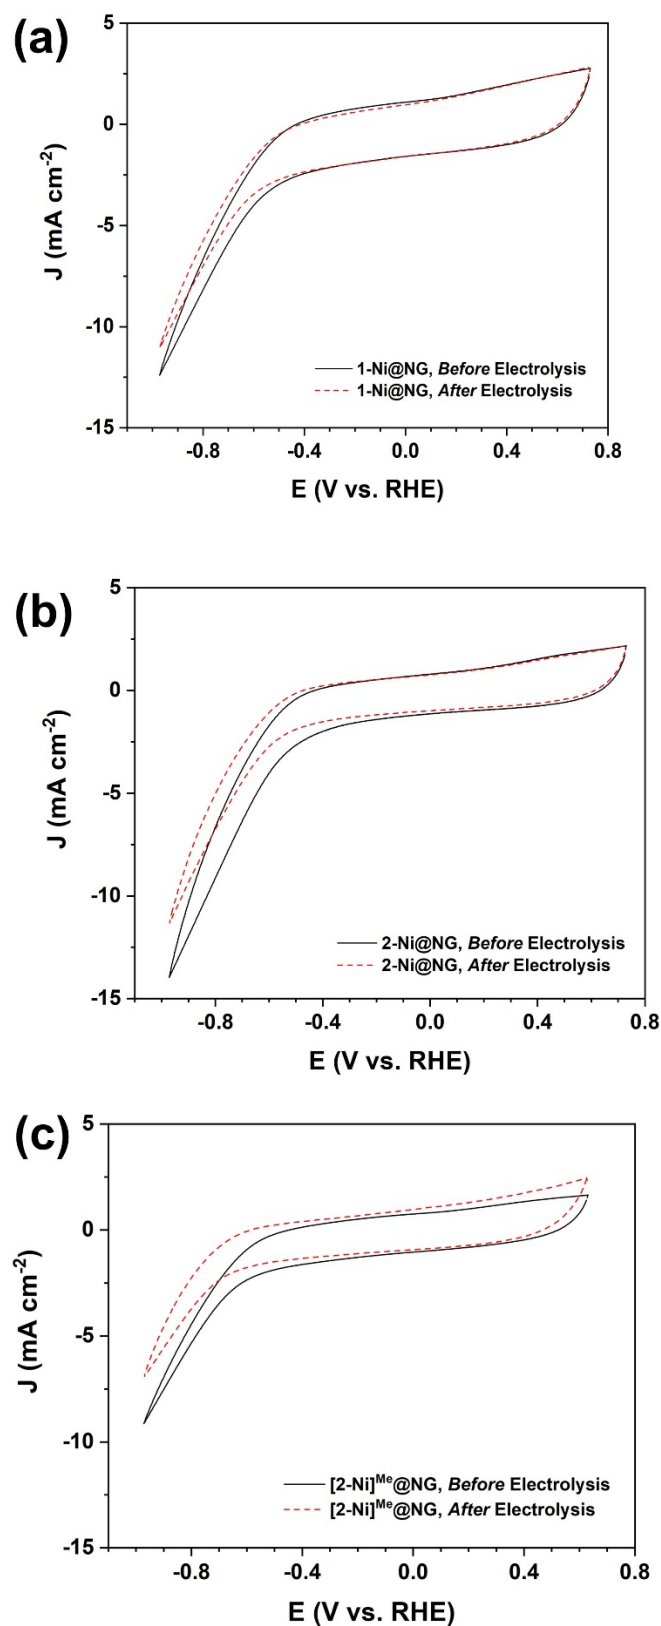

**Fig. S29** Cyclic voltammetry in CO<sub>2</sub>-saturated 0.5 M NaHCO<sub>3</sub> before (black solid line) and after electrolysis (red-dotted line) at -0.67 V vs. RHE for 4 h for (a) **1-Ni@NG**, (b) **2-Ni@NG** and (c) **[2-Ni]<sup>Me</sup>@NG**.

**1-Ni@NG/CP Before Electrolysis**

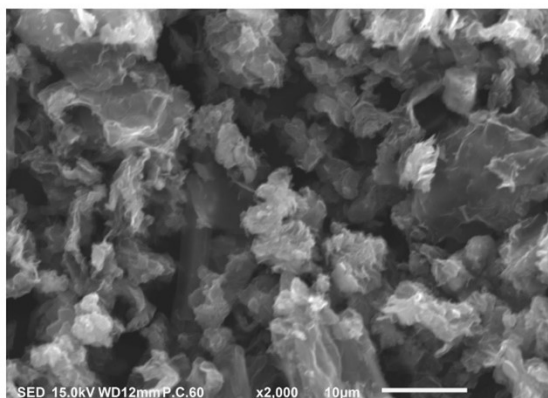

**1-Ni@NG/CP After Electrolysis**

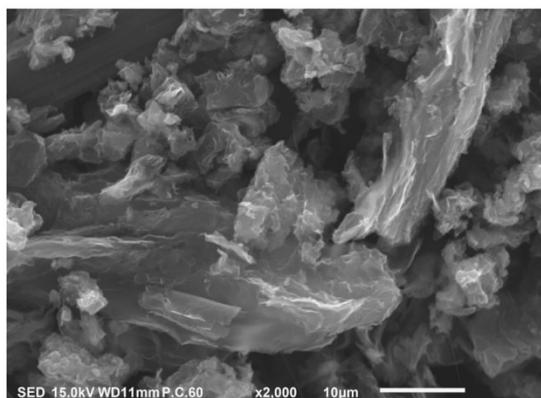

**2-Ni@NG/CP Before Electrolysis**

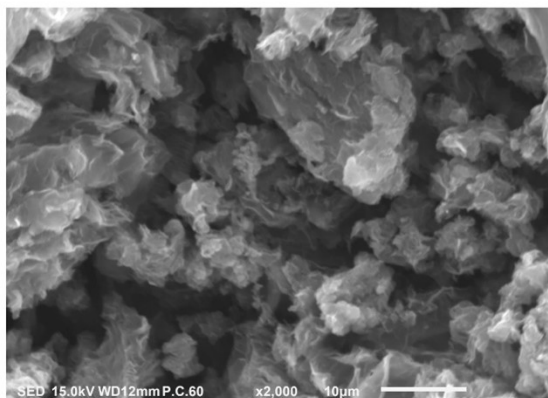

**2-Ni@NG/CP After Electrolysis**

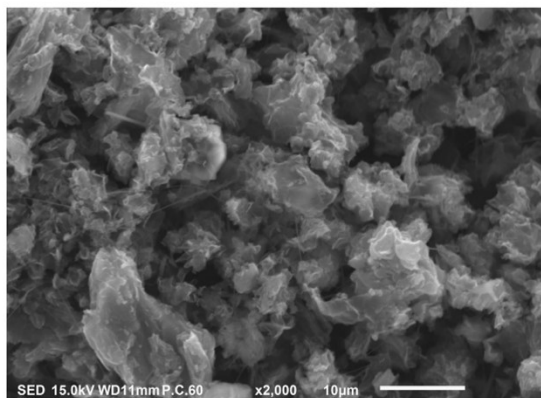

**[2-Ni]<sup>Me</sup>@NG/CP Before Electrolysis**

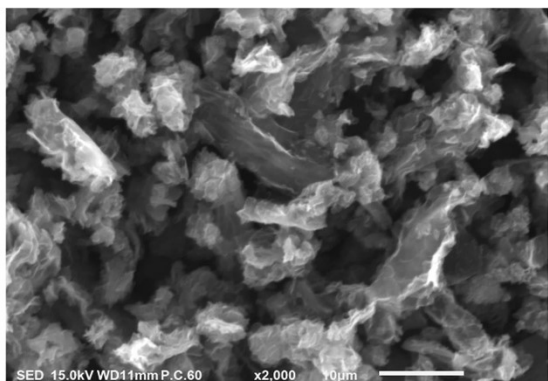

**[2-Ni]<sup>Me</sup>@NG/CP After Electrolysis**

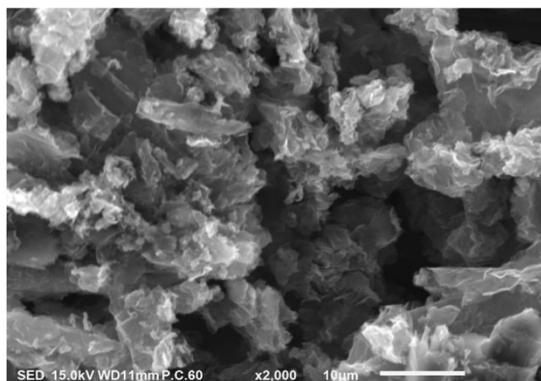

**Fig. S30** SEM images at 2000-fold magnification of **1-Ni@NG/CP**, **2-Ni@NG/CP** and **[2-Ni]<sup>Me</sup>@NG/CP** before and after electrocatalysis for 4 h at the applied potential of -0.67 V vs. RHE.

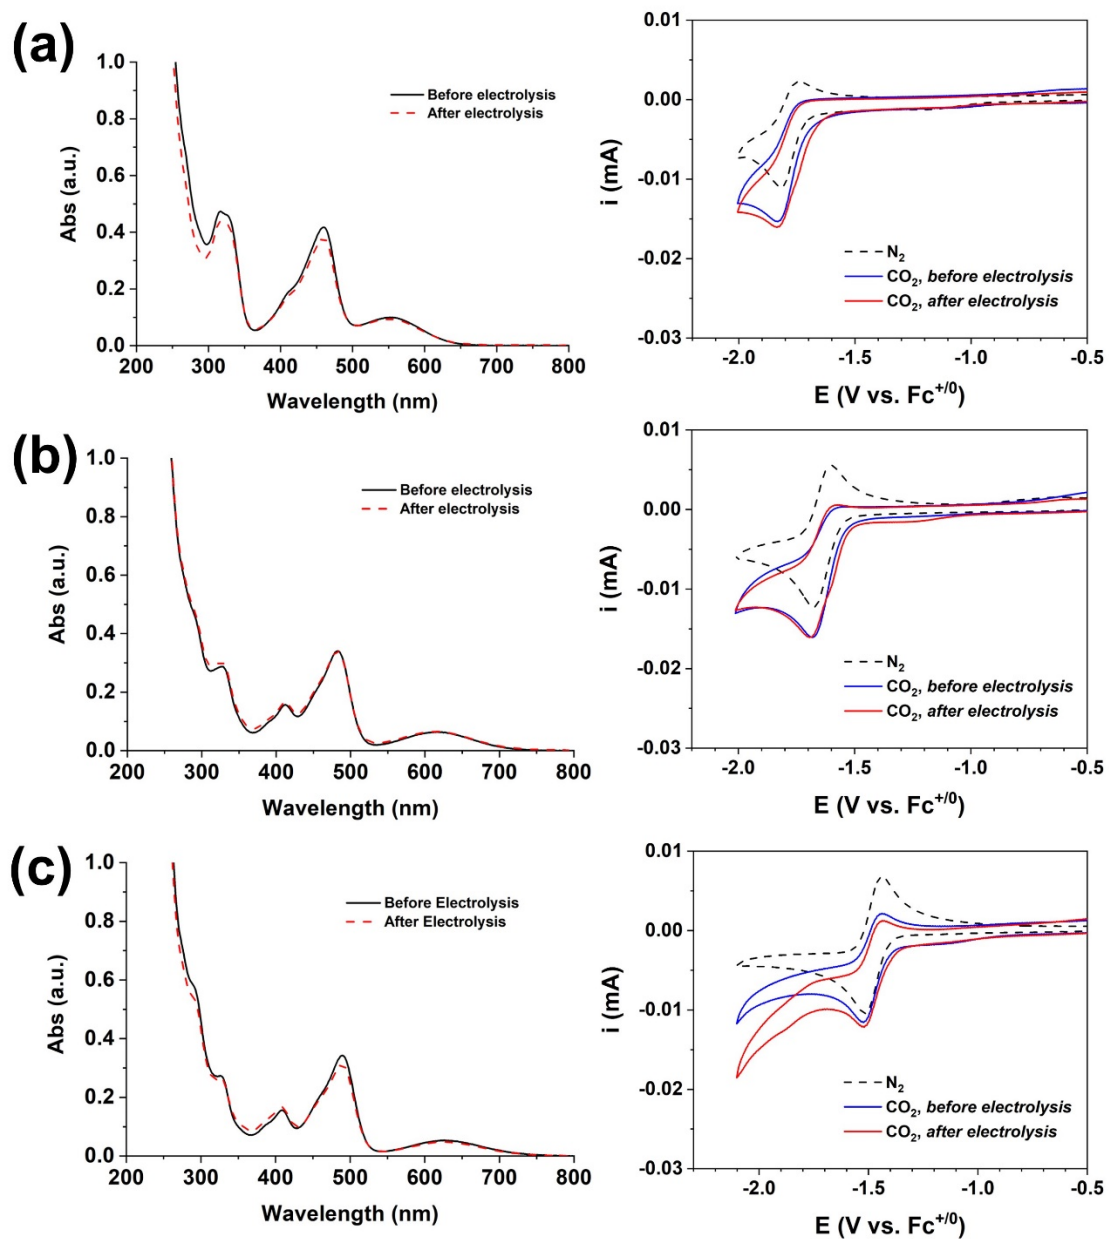

**Fig. S31** UV-visible spectroscopy (left panel) and cyclic voltammograms (right panel) of (a) 1-Ni, (b) 2-Ni and (c) 2-Ni<sup>Me</sup> before and after electrolysis at E = -1.85, -1.75 and -1.65 V vs. Fc<sup>+0</sup> in CO<sub>2</sub>-saturated 0.1 M N<sub>4</sub>BuPF<sub>6</sub>/CH<sub>3</sub>CN.

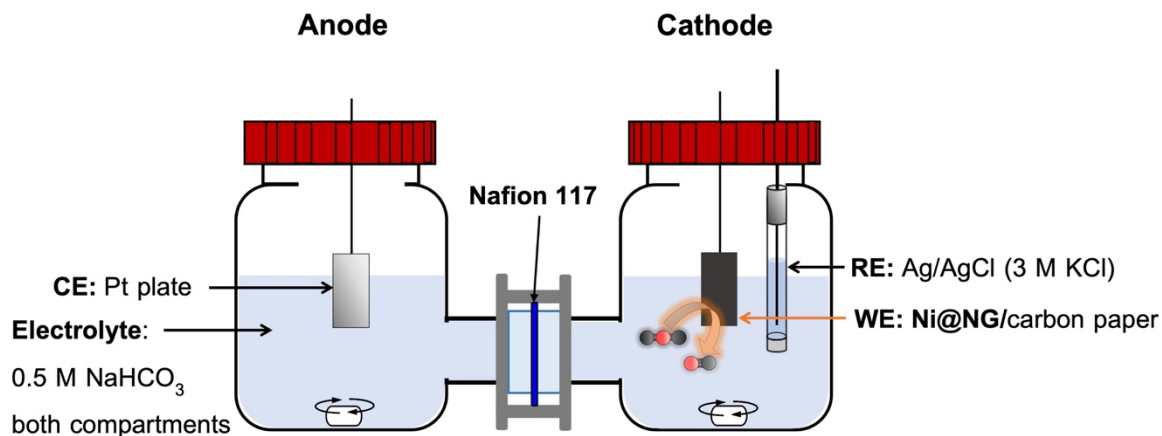

**Fig. S32** A two-compartment three-electrode electrochemical setup for aqueous system.

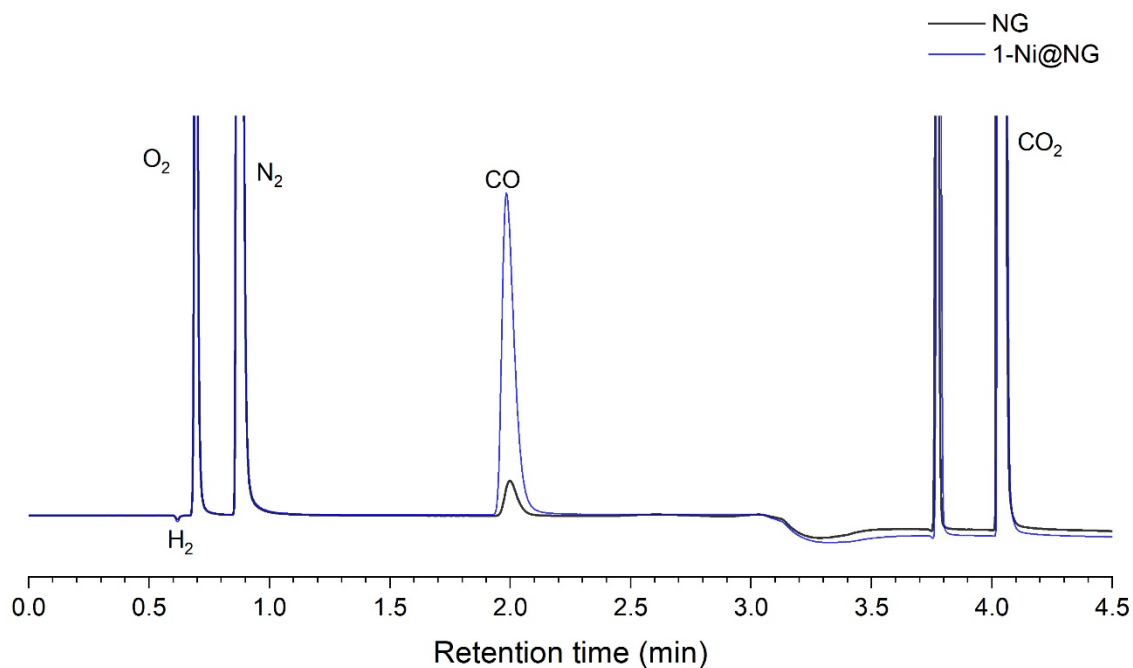

**Fig. S33** GC traces of bulk electrolysis using NG (black) and 1-Ni@NG (blue) in 0.5 M NaHCO<sub>3</sub> at E = -0.77 V vs. RHE for 1 h. Retention time of H<sub>2</sub> (0.617), O<sub>2</sub> (0.694), N<sub>2</sub> (0.869), CO (2.010) and CO<sub>2</sub> (4.023). The carrier gas was He and the detector was a thermal conductivity detector (TCD).

## Calculation of Faradaic Efficiency

$$\% \text{Faradaic Efficiency} = \frac{Q_{\text{output}}}{Q_{\text{input}}} \times 100$$

where  $e_{\text{input}}$  = the total number of moles of electrons measured during electrolysis

$e_{\text{output}}$  = the number of moles of electrons required for reducing  $\text{CO}_2$  to CO

For bulk electrolysis at  $E = -0.77 \text{ V vs. RHE}$

$$e_{\text{input}} = \frac{Q}{F} = \frac{\int i dt}{F} = \frac{11.60 \text{ C}}{96485 \frac{\text{C}}{\text{mole of electrons}}} = 1.20 \times 10^{-4} \text{ mole of electrons}$$

### Calculation of Faradaic Efficiency of CO

Volume of measured CO from GC = 4.42%, which was calibrated from standard gas

Head space of H-type cell = 28 mL

Hence, volume of CO produced = 28 mL  $\times$  0.0442 = 1.24 mL

Conversion of volume to mole of produced CO

From the law of ideal gases,

$$PV = nRT$$

$$n = PV/RT$$

$$n = (1 \text{ atm})(1.24 \times 10^{-3} \text{ L}) / (0.0821 \text{ L atm mol}^{-1} \text{ K}^{-1})(298.15 \text{ K})$$

Thus, moles of produced CO

$$n_{\text{CO}} = 5.07 \times 10^{-5} \text{ mol}$$

**Electrochemical  $\text{CO}_2$ -to-CO conversion:**  $\text{CO}_2 + 2\text{H}^+ + 2\text{e}^- \rightarrow \text{CO} + \text{H}_2\text{O}$

$$e_{\text{output}} = 5.07 \times 10^{-5} \text{ mol of CO} \times \frac{2 \text{ mol of electrons}}{1 \text{ mol of CO}} = 1.01 \times 10^{-4} \text{ mol of electrons}$$

$$\text{Hence, \%Faradaic Efficiency of CO} = \frac{e_{\text{output}}}{e_{\text{input}}} \times 100 = \frac{1.01 \times 10^{-4} \text{ mol of electrons}}{1.20 \times 10^{-4} \text{ mol of electrons}} \times 100 = 84.2\%$$

## Calculation of Faradaic Efficiency of H<sub>2</sub>

Volume of measured H<sub>2</sub> from GC = 0.87%, which was calibrated from standard gas

Head space of H-type cell = 28 mL

Hence, volume of produced H<sub>2</sub> = 28 mL x 0.0087 = 0.24 mL

Conversion of volume to mole of produced H<sub>2</sub>

From the law of ideal gases,  $PV = nRT$

$$n = PV/RT$$

$$n = (1 \text{ atm})(0.24 \times 10^{-3} \text{ L}) / (0.0821 \text{ L atm mol}^{-1} \text{ K}^{-1})(298.15 \text{ K})$$

Thus, moles of produced H<sub>2</sub>  $n_{\text{H}_2} = \underline{0.98 \times 10^{-5} \text{ mol}}$

**Hydrogen Evolution Reaction (HER):**  $2\text{H}^+ + 2\text{e}^- \rightarrow \text{H}_2$

$$e_{\text{output}} = 0.98 \times 10^{-5} \text{ mol of H}_2 \times \frac{2 \text{ mol of electrons}}{1 \text{ mol of CO}} = 1.96 \times 10^{-5} \text{ mol of electrons}$$

$$\text{Hence, \%Faradaic Efficiency of H}_2 = \frac{e_{\text{output}}}{e_{\text{input}}} \times 100 = \frac{1.96 \times 10^{-5} \text{ mol of electrons}}{1.20 \times 10^{-4} \text{ mol of electrons}} \times 100 = 16.3\%$$

## Summarized Data of Bulk Electrolysis at Various Potential Applied

**Table S9** Summary of data in bulk electrolysis in a CO<sub>2</sub>-saturated 0.5 M NaHCO<sub>3</sub> solution (pH 7.4) using **1-Ni@NG**

| <b>E<sub>applied</sub></b><br><b>(V vs. RHE)</b> | <b>Time</b><br><b>(h)</b> | <b>Charge (C)</b> | <b>CO</b><br><b>(<math>\mu</math>mol)</b> | <b>%FE(CO)</b> | <b>H<sub>2</sub></b><br><b>(<math>\mu</math>mol)</b> | <b>%FE(H<sub>2</sub>)</b> |
|--------------------------------------------------|---------------------------|-------------------|-------------------------------------------|----------------|------------------------------------------------------|---------------------------|
| -0.57                                            | 1                         | 3.4               | 11.0                                      | 62             | 5.9                                                  | 33                        |
| -0.67                                            | 1                         | 8.8               | 37.8                                      | 81             | 7.2                                                  | 16                        |
| -0.77                                            | 1                         | 11.6              | 50.7                                      | 84             | 9.8                                                  | 16                        |
| -0.87                                            | 1                         | 14.5              | 53.4                                      | 71             | 18.9                                                 | 25                        |

**Table S10** Summary of data in bulk electrolysis in a CO<sub>2</sub>-saturated 0.5 M NaHCO<sub>3</sub> solution (pH 7.4) using **2-Ni@NG**

| <b>E<sub>applied</sub></b><br><b>(V vs. RHE)</b> | <b>Time</b><br><b>(h)</b> | <b>Charge (C)</b> | <b>CO</b><br><b>(<math>\mu</math>mol)</b> | <b>%FE(CO)</b> | <b>H<sub>2</sub></b><br><b>(<math>\mu</math>mol)</b> | <b>%FE(H<sub>2</sub>)</b> |
|--------------------------------------------------|---------------------------|-------------------|-------------------------------------------|----------------|------------------------------------------------------|---------------------------|
| -0.57                                            | 1                         | 3.3               | 10.7                                      | 63             | 6.1                                                  | 36                        |
| -0.67                                            | 1                         | 10.3              | 40.6                                      | 76             | 13.7                                                 | 25                        |
| -0.77                                            | 1                         | 14.7              | 58.6                                      | 77             | 35.0                                                 | 23                        |
| -0.87                                            | 1                         | 24.0              | 77.3                                      | 62             | 44.1                                                 | 36                        |

**Table S11** Summary of data in bulk electrolysis in a CO<sub>2</sub>-saturated 0.5 M NaHCO<sub>3</sub> solution (pH 7.4) using **[2-Ni]<sup>Me</sup>@NG**

| <b>E<sub>applied</sub></b><br><b>(V vs. RHE)</b> | <b>Time</b><br><b>(h)</b> | <b>Charge (C)</b> | <b>CO</b><br><b>(<math>\mu</math>mol)</b> | <b>%FE(CO)</b> | <b>H<sub>2</sub></b><br><b>(<math>\mu</math>mol)</b> | <b>%FE(H<sub>2</sub>)</b> |
|--------------------------------------------------|---------------------------|-------------------|-------------------------------------------|----------------|------------------------------------------------------|---------------------------|
| -0.57                                            | 1                         | 2.0               | 6.2                                       | 58             | 2.6                                                  | 25                        |
| -0.67                                            | 1                         | 5.6               | 19.2                                      | 68             | 4.9                                                  | 17                        |
| -0.77                                            | 1                         | 8.6               | 29.8                                      | 67             | 9.0                                                  | 20                        |
| -0.87                                            | 1                         | 14.1              | 56.3                                      | 77             | 11.8                                                 | 16                        |



**Table S12** Comparison of selected bond lengths (Å), angles (°) and twist of diphenylamine unit for **1-Ni**, **2-Ni** and **[2-Ni]<sup>Me</sup>**.

|                           | <b>1-Ni<sup>a</sup></b> | <b>2-Ni<sup>b</sup></b> | <b>[2-Ni]<sup>Me</sup></b> |
|---------------------------|-------------------------|-------------------------|----------------------------|
| Bond lengths [Å]          |                         |                         |                            |
| Ni1–N1                    | 1.869(3)                | 1.867(2)                | 1.907(5)                   |
| Ni1–N2                    | 1.861(7)                | 1.894(2)                | 1.914(4)                   |
| Ni1–N3                    | 1.924(4)                | 1.942(2)                | 2.115(2)                   |
| Ni1–N4                    | 1.830(7)                | 1.899(2)                | 2.014(4)                   |
| Bond angles [°]           |                         |                         |                            |
| N1–Ni1–N2                 | 94.9(3)                 | 89.48(10)               | 87.4(2)                    |
| N1–Ni1–N3                 | 179.3(4)                | 174.78(10)              | 175.12(2)                  |
| N1–Ni1–N4                 | 95.3(3)                 | 90.51(10)               | 92.0(2)                    |
| N2–Ni1–N3                 | 85.2(3)                 | 85.98(10)               | 88.34(2)                   |
| N2–Ni1–N4                 | 169.83(19)              | 174.32(9)               | 179.5(2)                   |
| N3–Ni1–N4                 | 84.6(3)                 | 94.26(10)               | 92.2(2)                    |
| Twist of phenyl rings [°] | 47.3                    | 63.4                    | 60.9                       |

<sup>a,b</sup>Crystallographic data was obtained from ref. [S1] and [S2], respectively.

**Table S13** Comparison of the ECR performance of Ni@NG catalysts from this work with high-performance ECR molecular-based catalysts from recent literatures.

| Catalyst                                   | Cathode Material   | Electrolyte                                                                      | Applied Potential (V vs. RHE) | J (mA/cm <sup>2</sup> ) | Product(s)                                                      | %FE                 | TOF (h <sup>-1</sup> )                                                   | Method for analyzing active surface area of catalyst | Ref       |
|--------------------------------------------|--------------------|----------------------------------------------------------------------------------|-------------------------------|-------------------------|-----------------------------------------------------------------|---------------------|--------------------------------------------------------------------------|------------------------------------------------------|-----------|
| 1-Ni@NG                                    | Carbon Paper       | 0.5 M NaHCO <sub>3</sub> (pH 7.4)                                                | -0.67                         | ~2                      | CO                                                              | 81                  | 97.2                                                                     | ICP-AES                                              | This work |
| 2-Ni@NG                                    |                    |                                                                                  |                               | ~3                      |                                                                 | 75                  | 151.2                                                                    |                                                      |           |
| [2-Ni] <sup>Me</sup> @NG                   |                    |                                                                                  |                               | ~1.5                    |                                                                 | 68                  | 93.6                                                                     |                                                      |           |
| Pyrene-modified Ni(cyclam)/MWCNT           | GDL                | 0.1 M Bu <sub>4</sub> NPF <sub>6</sub> /CH <sub>3</sub> CN + 1% H <sub>2</sub> O | -2.54 <sup>a</sup>            | ~10                     | CO                                                              | >90                 | 4.27(s <sup>-1</sup> )                                                   | ECSA                                                 | S3        |
| NiPc                                       | CFP                | 0.5 M KHCO <sub>3</sub> (pH 7.2)                                                 | -0.80                         | -                       | CO                                                              | <40                 | -                                                                        | -                                                    | S4        |
| NiPc/CNT                                   | Carbon Paper       | 0.5 M KHCO <sub>3</sub> (pH 7.2)                                                 | -0.78                         | -                       | CO                                                              | 78                  | 1025                                                                     | -                                                    | S5        |
| PyNiPc/CNT                                 |                    |                                                                                  |                               | -                       |                                                                 | ~100                | 8715                                                                     |                                                      |           |
| Ni(Salen-NO <sub>2</sub> )                 | GDL                | 0.5 M KHCO <sub>3</sub> (pH 7.5)                                                 | -1.50 <sup>b</sup>            | -                       | CO<br>CH <sub>4</sub><br>C <sub>2</sub> H <sub>6</sub>          | ~40<br>~17<br>~17   | -                                                                        | -                                                    | S6        |
| Ni(Salen-NH <sub>2</sub> )/Graphite plates | Graphite Electrode | 0.5 M KHCO <sub>3</sub> (pH 7.0)                                                 | -1.80 <sup>c</sup>            | -                       | HCOOH<br>CH <sub>3</sub> OH<br>C <sub>2</sub> H <sub>5</sub> OH | 4.7<br>11.4<br>28.6 | 0.33(s <sup>-1</sup> )<br>0.8(s <sup>-1</sup> )<br>2.1(s <sup>-1</sup> ) | -                                                    | S7        |
| Ni-CNT-PP                                  | Glassy carbon, RDE | 0.5 M KHCO <sub>3</sub> (pH 7.3)                                                 | -0.71                         | 13.4                    | CO                                                              | 96                  | 0.6 x 10 <sup>5</sup>                                                    | ICP-OES                                              | S8        |
| Ni-CNT-CC                                  |                    |                                                                                  |                               | 32.3                    | CO                                                              | 99                  | ~10 <sup>5</sup>                                                         |                                                      |           |
| Ni-PMOF                                    | Carbon Cloth       | 0.5 M KHCO <sub>3</sub> (pH 7.2)                                                 | -0.80                         | 0.47                    | CO                                                              | 18.5                | 8.11                                                                     | -                                                    | S9        |
| Co-PMOF                                    |                    |                                                                                  |                               | ~18                     | CO                                                              | 98.7                | 1656                                                                     |                                                      |           |
| CoPc                                       | CFP                | 0.5 M KHCO <sub>3</sub> (pH 7.2)                                                 | -0.80                         | -                       | CO                                                              | 99                  | ~42                                                                      | ECSA                                                 | S4        |
| CoPc/CCG                                   | Carbon paper       | 0.1 M KHCO <sub>3</sub> (pH 6.8)                                                 | -0.59                         | ~0.8                    | CO                                                              | 63                  | ~2 (s <sup>-1</sup> )                                                    | ECSA                                                 | S10       |
| CoPc-Py/CNT                                | Carbon paper       | 0.2 M KHCO <sub>3</sub> (pH 7.0)                                                 | -0.63                         | ~5                      | CO                                                              | 98                  | 34.5(s <sup>-1</sup> )                                                   | Total Catalyst Loading                               | S11       |
| CoFPc/carbon cloth                         | Carbon cloth       | 0.5 M NaHCO <sub>3</sub> (pH 7.3)                                                | -0.80                         | ~4                      | CO                                                              | 93                  | 1.6(s <sup>-1</sup> )                                                    | ICP-OES                                              | S12       |
| Fe(bpc)Cl(H <sub>2</sub> O)/NG             | GC                 | 0.5 M NaHCO <sub>3</sub> (pH 7.3)                                                | -0.58                         | ~6                      | CO                                                              | 90                  | 2.1(s <sup>-1</sup> )                                                    | ECSA                                                 | S13       |
| Fe-TPPy/CNT                                | GC                 | 0.1 M NaHCO <sub>3</sub> (pH 6.8)                                                | -0.60                         | 19.6                    | CO                                                              | 37                  | 0.97(s <sup>-1</sup> )                                                   | -                                                    | S14       |
| Fe-adj-TPPy/CNT                            | GC                 |                                                                                  |                               |                         | CH <sub>4</sub>                                                 | 17                  | 0.07(s <sup>-1</sup> )                                                   |                                                      |           |
|                                            |                    |                                                                                  |                               |                         | CO                                                              | 67                  | 3.49 (s <sup>-1</sup> )                                                  |                                                      |           |
|                                            |                    |                                                                                  |                               |                         | CH <sub>4</sub>                                                 | 25                  | 0.07(s <sup>-1</sup> )                                                   |                                                      |           |

<sup>a</sup> Applied potential was reported in V vs.  $Fc^{+/0}$ , <sup>b</sup> Applied potential was reported in V vs. SHE, <sup>c</sup> Applied potential was reported in V vs. Ag/AgCl, ECSA = electrochemically active surface area, CFP = carbon fibre paper, GDL = gas diffusion electrode, GC = glassy carbon, RDE = rotating disk electrode, Pc = phthalocyanine, bpc = 4,5-dichloro-1,2-bis(pyridine-2-carboximido)benzene, CCG = chemically converted graphene, CNT = carbon nanotube, MWCNT = multi-walled carbon nanotube.

## References

- [S1] R. Sanyal, S. A. Cameron and S. Brooker, *Dalton Trans.* **2011**, 40, 12277-12287.
- [S2] R. K. Wilson and S. Brooker, *Dalton Trans.* **2013**, 42, 7913-7923.
- [S3] S. Pugliese, N. T. Huan, J. Forte, D. Grammatico, S. Zanna, B. L. Su, Y. Li and M. Fontecave, *ChemSusChem*, **2020**, 13, 6449-6456.
- [S4] Z. Zhang, J. Xiao, X. J. Chen, S. Yu, L. Yu, R. Si, Y. Wang, S. Wang, X. Meng, Y. Wang, Z. Q. Tian and D. Deng, *Angew. Chem. Int. Ed.*, **2018**, 57, 16339-16342.
- [S5] D.-D. Ma, S.-G. Han, C. Cao, X. Li, X.-T. Wu and Q.-L. Zhu, *Appl. Catal. B*, **2020**, 264.
- [S6] S. Singh, B. Phukan, C. Mukherjee and A. Verma, *RSC Adv.*, **2015**, 5, 3581-3589.
- [S7] P. Bose, C. Mukherjee and A. K. Golder, *Inorg. Chem. Front.*, **2019**, 6, 1721-1728.
- [S8] S. Liu, H. B. Yang, S. F. Hung, J. Ding, W. Cai, L. Liu, J. Gao, X. Li, X. Ren, Z. Kuang, Y. Huang, T. Zhang and B. Liu, *Angew. Chem. Int. Ed.*, **2020**, 59, 798-803.
- [S9] Y. R. Wang, Q. Huang, C. T. He, Y. Chen, J. Liu, F. C. Shen and Y. Q. Lan, *Nat. Commun.*, **2018**, 9, 4466.
- [S10] J. Choi, P. Wagner, S. Gambhir, R. Jalili, D. R. MacFarlane, G. G. Wallace and D. L. Officer, *ACS Energy Lett.*, **2019**, 4, 666-672.
- [S11] M. Zhu, J. Chen, R. Guo, J. Xu, X. Fang and Y.-F. Han, *Appl. Catal. B*, **2019**, 251, 112-118.
- [S12] N. Morlanés, K. Takane and V. Rodionov, *ACS Catal.*, **2016**, 6, 3092-3095.
- [S13] E. A. Mohamed, Z. N. Zahran, Y. Tsubonouchi, K. Saito, T. Yui and M. Yagi, *ACS Appl. Energy Mater.*, **2020**, 3, 4114-4120.
- [S14] M. Abdinejad, C. Dao, B. Deng, F. Dinic, O. Voznyy, X.-a. Zhang and H.-B. Kraatz, *ACS Sustain. Chem. Eng.*, **2020**, 8, 9549-9557.
